## Title

Patterns of presentations of children to emergency departments across Europe and the impact of the COVID-19 pandemic: retrospective observational multinational study.

## Authors:

Ruud G. Nijman <sup>1,2,3</sup> \* [r.nijman@imperial.ac.uk; ORCID 0000-0001-9671-8161], Kate Honeyford <sup>4</sup> [k.honeyford@imperial.ac.uk; ORCID 0000-0002-5533-7693], Ruth Farrugia <sup>5</sup> [ruth.b.farrugia@gov.mt; ORCID 0000-0002-1553-2486], Katy Rose <sup>1,6</sup> [katy.rose2@nhs.net; ORCID 0000-0002-2020-4161], Zsolt Bognar <sup>7</sup> [bognarzs@heimpalkorhaz.hu; ORCID 0000-0002-2328-3512], Danilo Buonsenso <sup>8,9</sup> [danilobuonsenso@gmail.com; ORCID 0000-0001-8567-2639], Liviana Da Dalt <sup>10</sup> [liviana.dadalt@unipd.it], Tisham De <sup>2</sup> [tisham.de08@imperial.ac.uk; ORCID 0000-0001-7278-0534], Ian K. Maconochie <sup>1,3</sup> [i.maconochie@imperial.ac.uk; ORCID 0000-0001-6319-8550], Niccolo Parri <sup>11</sup> [niccolo.parri@meyer.it; ORCID 0000-0002-8098-2504], Damian Roland <sup>12,13</sup> [dr98@leicester.ac.uk; ORCID 0000-0001-9334-5144], Tobias Alfven <sup>14</sup> [tobias.alfven@ki.se; ORCID 0000-0002-2328-3512], Camille Aupiais <sup>15</sup> [camille.aupiais@aphp.fr; ORCID 0000-0001-7482-0405], Michael Barrett <sup>16,17,18</sup> [michael.barrett@ucd.ie; ORCID 0000-0003-1775-8347], Romain Basmaci <sup>19</sup> [romain.basmaci@aphp.fr; ORCID 0000-0002-5277-0002], Dorine Borensztajn <sup>20,21</sup> [d.borensztajn@erasmusmc.nl; ORCID 0000-0002-2437-0757], Susana Castanhinha <sup>22</sup> [c; ORCID 0000-0003-0762-7730], Vasilico Corrine <sup>23</sup> [c.vasilico@salk.at; ORCID 0000-0001-8911-1097], Sheena Durnin <sup>24</sup> [Sheena.Durnin@tuh.ie], Paddy Fitzpatrick <sup>25</sup> [patrick.fitzpatrick@cuh.ie], Laszlo Fodor <sup>26</sup> [fodordr@gmail.com; ORCID 0000-0002-4984-4058], Borja Gomez <sup>27,28</sup> [BORJA.GOMEZCORTES@osakidetza.eus; ORCID 0000-0001-6542-4494], Susanne Greber-Platzer <sup>29,30</sup> [susanne.greber-platzer@meduniwien.ac.at; ORCID 0000-0002-3706-8370], Romain Guedj <sup>31</sup> [romain.guedj@aphp.fr], Stuart Hartshorn <sup>32,33</sup> [stuart.hartshorn@nhs.net; ORCID 0000-0003-0419-1564], Florian Hey <sup>34</sup> [Florian.Hey@med.uni-muenchen.de; ORCID 0000-0001-6183-5798], Lina Jankauskaite <sup>35</sup> [lin.jankauskaite@gmail.com], Daniela Kohlfuerst <sup>36</sup> [daniela.kohlfuerst@medunigraz.at; ORCID 0000-0002-1188-9525], Mojca Kolnik <sup>37</sup> [mojca.kolnik@kclj.si; ORCID 0000-0003-

4194-7295], Mark D Lyttle <sup>38,39</sup> [mdlyttle77@gmail.com; ORCID 0000-0002-8634-7210], Patrícia Mação <sup>40</sup> [patriciamacao@chuc.min-saude.pt; ORCID 0000-0002-1076-806X], Maria Inês Mascarenhas <sup>41</sup> [maria.i.mascarenhas@hff.min-saude.pt; ORCID 0000-0002-5463-8857], Shrouk Messahel <sup>42</sup> [Shrouk@doctors.org.uk; ORCID 0000-0003-0645-3070], Esra Akyüz Özkan <sup>43</sup> [uzdresra@gmail.com; ORCID 0000-0001-9412-8010], Zanda Pučuka <sup>44</sup> [zanda.pucuka@bkus.lv; ORCID 0000-0002-6070-3563], Sofia Reis <sup>45</sup> [reis.carlasofia@gmail.com; ORCID 0000-0002-3667-9241], Alexis Rybak <sup>46,47,48</sup> [alexis.rybak@aphp.fr; ORCID 0000-0002-2898-3710], Malin Ryd Rinder <sup>49</sup> [malin.ryd-rinder@regionstockholm.se; ORCID 0000-0002-2947-4117], Ozlem Teksam <sup>50</sup> [ozlemt@hacettepe.edu.tr; ORCID 0000-0003-1856-0500], Caner Turan <sup>51</sup> [canertrn@yahoo.com], Valtýr Stefánsson Thors <sup>52</sup> [valtyr@landspitali.is; ORCID 0000-0002-0976-9604], Roberto Velasco <sup>53</sup> [robertovelascozuniga@gmail.com; ORCID 0000-0003-0073-2650], Silvia Bressan <sup>10</sup> [silviabress@gmail.com; ORCID 0000-0002-6736-5392], Henriette A Moll <sup>20</sup> [h.a.moll@erasmusmc.nl], Rianne Oostenbrink <sup>20</sup> [r.oostenbrink@erasmusmc.nl; ORCID 0000-0001-7919-8934], Luigi Titomanlio <sup>46,47,48</sup> [luigi.titomanlio@aphp.fr; ORCID 0000-0003-4909-803X], in association with the REPEM network (Research in European Pediatric Emergency Medicine) as part of the EPISODES study group ^

## Affiliations:

1. Department of Pediatric Emergency Medicine, Division of Medicine, St. Mary's hospital - Imperial College NHS Healthcare Trust, London, London, London, UK
2. Faculty of Medicine, Department of Infectious Diseases, Section of Pediatric Infectious Diseases, Imperial College London, UK
3. Centre for Pediatrics and Child Health, Imperial College, London, UK
4. Faculty of Medicine, School of Public Health, Imperial College London, London, UK
5. Department of Child and Adolescent Health, Mater Dei Hospital, Msida, Malta
6. Division of Emergency Medicine - Pediatrics, University College London NHS Foundation Trust, London, UK
7. Department of Pediatric Emergency Medicine, Heim Pal National Pediatric Institute, Budapest, Hungary

8. Department of Woman and Child Health and Public Health, Fondazione Policlinico Universitario A. Gemelli IRCCS, Rome, Italy
9. Università Cattolica del Sacro Cuore, Rome, Italy
10. Division of Pediatric Emergency Medicine, Department of Women's and Children's Health, University Hospital of Padova, Italy
11. Emergency Department & Trauma Center, Ospedale Pediatrico Meyer Firenze, Florence, Italy
12. SAPHIRE Group, Health Sciences, Leicester University, Leicester, UK
13. Pediatric Emergency Medicine Leicester Academic (PEMLA) Group, Leicester Hospitals, Leicester, UK
14. Pediatric emergency department, Sachs' Children and Youth Hospital, Stockholm, Sweden
15. Pediatric Emergency Department, Jean Verdier Hospital, Bondy, France
16. Pediatric Emergency Department, Children's Health Ireland at Crumlin, Ireland
17. Women's and Children's Health, School of Medicine, University College Dublin, Dublin, Ireland
18. National Children's Research Centre, Crumlin, Dublin, Ireland
19. Pediatric Emergency Department, Louis Mourier Hospital, Colombes, France
20. Department of General Pediatrics, Erasmus MC – Sophia, Rotterdam, The Netherlands
21. Emergency Department, Medisch Centrum Alkmaar, Noordwest Ziekenhuisgroep, Alkmaar, The Netherlands
22. Hospital Dona Estefania, Centro Hospitalar de Lisboa Central, Portugal
23. Department of Pediatrics, Paracelsus Medical University, Salzburg, Austria
24. Pediatric Emergency Department, Children's Health Ireland at Tallaght, Ireland
25. Pediatric Emergency Department, Children's Health Ireland at Temple Street, Ireland
26. Pediatric Emergency Department, Szent Gyorgy University Teaching Hospital of Fejer County, Szekesfehervar, Hungary
27. Pediatric emergency department, Cruces University Hospital, Barakaldo, Spain
28. Biocruces Bizkaia Health Research Institute, Cruces University Hospital, Barakaldo, Spain

29. Pediatric Emergency Outpatient Clinic, Clinical Division of Pediatric Pulmonology, Allergology and Endocrinology, Department of Pediatrics and Adolescent Medicine, Medical University Vienna, Vienna, Austria
30. Clinical Division of Pediatric Pulmonology, Allergology and Endocrinology, Department of Pediatrics and Adolescent Medicine, Comprehensive Centre for Pediatrics, Medical University of Vienna, Vienna, Austria
31. Pediatric Emergency Department, Armand Trousseau Hospital, Paris, France
32. Pediatric emergency department, Birmingham women's and children's NHS Foundation Trust, Birmingham, UK
33. Birmingham Clinical Trials Unit, Institute of Applied Health Research, University of Birmingham, Birmingham, UK
34. Pediatric emergency department and pediatric intensive care unit, Dr. von Hauner Children's Hospital, Ludwig-Maximilians-University Munich, Munich, Germany
35. Hospital of Lithuanian University of Health Sciences Kauno Klinikos, Lithuania
36. Department of General Pediatrics, Medical University of Graz, Austria
37. University Medical Centre Ljubljana, Univerzitetni Klinični Center, Department of Infectious Diseases, Ljubljana, Slovenia
38. Emergency Department, Bristol Royal Hospital for Children, Bristol, UK
39. Faculty of Health and Applied Sciences, University of the West of England, Bristol, UK
40. Pediatric Emergency Service, Hospital Pediátrico, Centro Hospitalar e Universitário de Coimbra, Portugal
41. Departamento da Criança e do Jovem- Urgencia Pediatrica, Hospital Prof. Doutor Fernando da Fonseca, Amadora, Portugal
42. Pediatric emergency department, Alder Hey Children's NHS Foundation Trust, Liverpool, UK
43. Pediatric Emergency Department, Ondokuz Mayıs University, Samsun, Turkey
44. Pediatric emergency department, Children's Clinical University Hospital, Riga Stradins University, Riga, Latvia
45. Pediatric Department, Centro Hospitalar Tondela-Viseu, Viseu, Portugal
46. Pediatric Emergency Department, Hopital Universitaire Robert-Debre, Paris, France
47. ACTIV, Association Clinique et Thérapeutique Infantile du Val-de-Marne, Créteil, France
48. INSERM, ECEVE, Université de Paris, Paris, France

49. Pediatric emergency department, Astrid Lindgrens Children's hospital, Karolinska University, Sweden
50. Division of Pediatric Emergency Medicine, Department of Pediatrics, Hacettepe University School of Medicine, Ankara, Turkey
51. Department of Pediatrics, Division of Emergency Medicine, Mersin City Training and Research Hospital, Toroslar, Mersin, Turkey
52. Children's Hospital, Barnaspítali Hringssins, Reykjavik, Iceland
53. Pediatric emergency unit, Hospital Universitario Río Hortega, Valladolid, Spain

\*Corresponding author:

email: [r.nijman@imperial.ac.uk](mailto:r.nijman@imperial.ac.uk) (RN)

^Membership of the EPISODES study group is provided as supporting information

# 1 **Abstract**

2

## 3 **Background**

4 To investigate the impact of the COVID-19 pandemic and infection prevention measures on  
5 children visiting emergency departments across Europe.

6

## 7 **Methods**

8 Routine health data were extracted retrospectively from electronic patient records of  
9 children aged <16 years, presenting to 38 emergency departments (ED) in 16 European  
10 countries for the period January 2018 – May 2020, using predefined and standardized data  
11 domains. Observed and predicted numbers of ED attendances were calculated for the  
12 period February 2020 to May 2020. Poisson models and incidence rate ratios (IRR) were  
13 used to compare age groups, diagnoses and outcomes.

14

## 15 **Findings**

16 Reductions in pediatric ED attendances, hospital admissions and high triage urgencies were  
17 seen in all participating sites. ED attendances were relatively higher in countries with lower  
18 SARS-CoV-2 prevalence (incidence rate ratio (IRR) 2·62, 95% CI 2·19 to 3·13) and in children  
19 aged >12 months (12-<24 months IRR 0·89, 95% CI 0·86 to 0·92; 2-<5years IRR 0·84, 95% CI  
20 0·82 to 0·87; 5-<12 years IRR 0·74, 95% CI 0·72 to 0·76; 12-<16 years IRR 0·74, 95% CI 0·71 to  
21 0·77; vs. age <12 months as reference group). The impact on pediatric intensive care  
22 admissions (IRR 1·30, 95% CI 1·16 to 1·45) was not as great as the impact on general

1 admissions. Lower triage urgencies were reduced more than higher triage urgencies (urgent  
2 triage IRR 1·10, 95% CI 1·08 to 1·12; emergent and very urgent triage IRR 1·53, 95% CI 1·49  
3 to 1·57; vs. non-urgent triage category). Reductions were highest and sustained throughout  
4 the study period for children with communicable infectious diseases.

5

## 6 **Interpretation:**

7 Reductions in ED attendances were seen across Europe during the first COVID-19 lockdown  
8 period. More severely ill children continued to attend hospital more frequently compared to  
9 those with minor injuries and illnesses, although absolute numbers fell.

10

## 11 **Funding:**

12 RGN was supported by National Institute of Health Research, award number ACL-2018-021-  
13 007.

14

## 15 **Trial registry:**

16 ISRCTN91495258

17

# 1 Introduction

2 Healthcare systems across Europe continue to be greatly affected by the COVID-19  
3 pandemic. During the initial phase of the pandemic, evidence emerged that children were  
4 less likely to develop symptoms of severe acute SARS-CoV-2 infection, when compared with  
5 adults. [1–5] In fact, reduced numbers of children visiting urgent and emergency care  
6 services were reported following the introduction of infection prevention measures. These  
7 seemed to be greatest for infectious communicable diseases. [6–10] Typically, these studies  
8 did not compare patterns between countries or in relation to different public health  
9 strategies.

10

11 At the same time, concerns were raised about potential delays in, and higher acuity  
12 of, presentations to appropriate healthcare services, as a result of difficulties accessing  
13 these services, changes in health care provision preferencing virtual consultations, fear of  
14 exposure to SARS-CoV-2 in health care facilities and blanket ‘Stay at Home’ statements. [11–  
15 13] In the UK this resulted in a statement from the Royal Society of Pediatrics and Child  
16 Health to reassure parents and caregivers, urging them to seek appropriate urgent and  
17 emergency medical attention when worried about the acute illness or injury of their child.  
18 [14] Additionally, mostly anecdotal evidence reported increased numbers of specific  
19 childhood diagnoses, such as diabetic ketoacidosis [15] and intussusception [16]. These  
20 implicated a possible link with SARS-CoV-2 infection, yet evidence from large scale cohorts is  
21 lacking. Concerns were also raised for the mental health of children resulting from school  
22 closures and stay at home orders. [17,18]

23



1           In this study, we aimed to compare the number of children presenting to emergency  
2 departments (EDs) across Europe during the first phase of the COVID-19 pandemic with the  
3 two previous years; investigating any change in severity of illness and describing the  
4 associations with specific diagnoses potentially related to SARS-CoV-2.

## 6 **Methods**

### 7 **Study design, setting and participants**

8           This retrospective, observational study included 38 sites from 16 European countries  
9 (S1 Table) as part of the ‘Epidemiology, severity and outcomes of children presenting to  
10 emergency departments across Europe during the SARS-CoV-2 pandemic’ (EPISODES) –  
11 study (trial registration number: ISRCTN91495258). Sites were selected from the Research in  
12 European Pediatric Medicine (REPEM) and the Pediatric Emergency Research in the United  
13 Kingdom and Ireland (PERUKI) networks following the earlier work of Bressan et al. [19]  
14 Routine clinical data from all children presenting to the ED were extracted from electronic  
15 health records for the period January 1<sup>st</sup> 2018 – May 17<sup>th</sup> 2020. Upper age limit varied  
16 between sites at between 16 and <18 years old.

17  
18           Aggregated, standardized data were uploaded using the REDCap online platform (S2  
19 File). For the period January 1<sup>st</sup> 2018 and February 1<sup>st</sup> 2020 data were collected on a  
20 monthly basis. For the period February 2<sup>nd</sup> 2020 – May 17<sup>th</sup> 2020 on a weekly basis. This  
21 amounted to a total of forty time-windows (S3 Table). The clinical report form included ten  
22 different data domains: 1) moment of presentation, 2) patient characteristics, 3) mode of  
23 arrival and referral pathway, 4) triage urgency, 5) type of presenting problem, 5) vital signs,

1 6) diagnostics performed in the ED, 7) treatment in the ED, 8) diagnosis, 9) hospital  
2 admission, 10) duration of ED and hospital stay (S2 File); data availability varied between  
3 sites (S4 Fig).

4  
5 Triage urgency levels, used to determine the urgency of care in the ED, were  
6 categorized in three categories, defined as emergent-very urgent (or RED-ORANGE, or level  
7 1-2), urgent (or YELLOW, or level 3) and standard-non urgent (or GREEN-BLUE, or level 4-5)  
8 to allow uniform coding between sites. For diagnosis coding, ICD-10 codes were issued for  
9 guidance (S5 Table), but an internally and temporally consistent coding approach was  
10 encouraged for each of the individual sites, acknowledging different coding systems and  
11 strategies in the ED. This was checked by plotting the diagnoses coding in time as  
12 percentage of total number of attendances for each site. Severity was defined based on  
13 level 1-2 urgency classification at triage, any hospital admissions, pediatric intensive care  
14 unit (PICU) admission or death in ED.

15

## 16 **Data analyses**

17 The completeness, quality and internal consistency of data were checked by plotting  
18 the absolute numbers, as well as percentage of total attendances, for each variable of  
19 interest in time for the whole study period 2018 – 2020. In order to quantify changes in  
20 attendances we compared observed attendances with predicted numbers of attendances.  
21 Predicted numbers of attendances were estimated using monthly data for the 25 months  
22 prior to February 3<sup>rd</sup> 2020. As the data had both a trend and seasonal component we used  
23 Holt-Winters exponential smoothing to make short-term monthly forecasts for February,

1 March, April and May 2020. We adjusted these to weekly estimates of predicted numbers.  
2 We plotted predicted ED attendances against the introduction of national infection  
3 prevention measures (Fig 1, S6 Table). [20] We also calculated twenty-eight day mean  
4 numbers for selected diagnoses, PICU and hospital admission, and death in ED for each  
5 month from January through to April for the years 2018 to 2020.

6  
7 We used a Poisson model, adjusted for time since February 3<sup>rd</sup> 2020, to determine if  
8 there were differences between age groups, diagnoses and disposition for patients. For each  
9 model, the outcome was the count of attendances per week from the week beginning  
10 February 3<sup>rd</sup> 2020 to the week beginning May 4<sup>th</sup> 2020, with an offset of the predicted  
11 number of attendances in each week. For age groups, the analysis was adjusted for site; for  
12 diagnoses and disposition, numbers were too small to make forecasts at site level and we  
13 therefore aggregated these across the whole sample. For diagnoses, we completed two  
14 models, one with eight separate diagnoses and one where these were divided into three  
15 groups: surgical presentation (ie. appendicitis), communicable diseases (ie. tonsillitis, otitis  
16 media, lower respiratory tract infection (LRTI) and gastroenteritis) and 'other' (ie. mental  
17 health issue, radius fracture and minor head trauma). For three diagnosis groups the  
18 number of attendances were too low to make sensible forecasts, namely diabetic keto-  
19 acidosis, testicular torsion and the combined group of intussusception, volvulus and  
20 malrotation. In addition, we determined if there were associations between the change in  
21 hospital attendances and the prevalence of SARS-CoV-2 in the country, as per the European  
22 Centre for Disease Prevention and Control (ECDC) (Fig 1, S7 Table) and the number of COVID-  
23 19 measures that were introduced in each hospital in response to the pandemic as  
24 previously detailed by Rose et al. [21] Rose et al. performed a survey study describing all

1 major changes in local and regional health care pathways, including the diverting of patient  
2 groups to or away from the ED, and service provision in each of the study sites. High  
3 prevalence countries were defined as a cumulative 14-day rate of >80 new cases per  
4 100,000 of the population. For countries where there was more than one site per country  
5 we used an ANOVA to determine if there was evidence that within country differences were  
6 greater than between country differences, for total attendances in March and April,  
7 adjusted for predicted numbers to account for differences in site sizes. One site (MAL001)  
8 was unable to provide information on diagnosis so it was excluded from this section of  
9 analysis; three sites (SLO001, POR005, TUR001) did not provide triage data. Two sites were  
10 excluded (NL002 and HUN002) from the forecasting analyses and Poisson models as they  
11 had missing data in the period before the pandemic (2018). One site (IRE003) was excluded  
12 from the Poisson models because it closed to pediatric attendances in response to the  
13 pandemic. One site (TUR003) accounted for 18% of all attendances and we carried out  
14 sensitivity analysis to confirm the impact of this site on all results. Analyses were performed  
15 using R v4.0.0.

16

## 17 **Ethics**

18       Following initial approval by the UK Health Research Authority, all participating sites  
19 obtained approval from their national/local institutional review boards (S8 Table). The need  
20 for individual patient informed consent was waived. Data sharing agreements were in place.

21

## 1 **Role of the funding source**

2 Funding sources and study sponsor (Imperial College London) had no roles in the  
3 collection, analysis and interpretation of data; in the writing of the report; or in the decision  
4 to submit the paper for publication  
5

## 6 **Results**

### 7 **Description of sites**

8 Sites included in the study varied in terms of size and service provision (S1 Table).  
9 The annual number of ED attendances ranged from 4,961 (NL001, 2019) to 295,787  
10 (TUR003, 2019) (S9 Fig). All but three sites were tertiary academic hospitals with specialized  
11 pediatric emergency departments; the remaining three sites were general teaching  
12 hospitals, two of which had dedicated pediatric sections and staff, and one of which had a  
13 mixed emergency department. Sites in Austria, Slovenia and Netherlands mainly saw  
14 medical presentations, whereas the other sites saw both medical and surgical/trauma  
15 presentations.  
16

### 17 **Description of infection prevention measures and SARS-CoV-2** 18 **prevalence**

19 Timing and degree of infection prevention measures were similar across European  
20 countries (Fig 1; S6 Table). Notably, Iceland and Sweden did not close day-care, nurseries, or  
21 primary education; Germany and the United Kingdom kept higher education open; Sweden  
22 did not close any public spaces; Hungary and Sweden did not advocate use of face masks;

1 Malta, Iceland and Sweden did not introduce stay-at-home recommendations; and  
2 Germany, Hungary and Iceland did not formally close workspaces. Highest national  
3 prevalence of SARS-CoV-2 varied between countries (Fig 1, S7 Table).

4

### 5 **Fig 1. Timelines of first phase of COVID-19 pandemic in participating countries**

6 Legend:

7 Timelines of the introduction of national infection prevention measures ('Response  
8 measures'), as well as dates for the first and 1<sup>st</sup> 100 cases of SARS-CoV-2 for each of the  
9 countries participating in the EPISODES study. The black circle depicts the date of the  
10 highest 14 day cumulative rate of new SARS-CoV-2 cases per 100,000, with the size  
11 reflecting the actual case rate.

12

### 13 **Impact on total attendances**

14 All 38 sites had significant reductions in attendances in spring 2020 (Table 1, Fig 2).

15 The largest reduction was seen in AUS001 with observed numbers at 5% (95% CI 5% to 6%)

16 of predicted in the week starting 30/03/2020; the smallest peak reduction in ED

17 attendances was at 56% (96% CI 52% to 60%) of predicted in SWE001 during the same

18 week. IRE003 closed for pediatric visits from 30/03/2020 onwards, with most patients

19 diverted to IRE001. Poisson models, adjusted for time since intervention and predicted

20 numbers of attendances showed that there were significant differences between sites.

21 Observed attendances, with respect to predicted, were relatively higher in sites in France,

22 Sweden, Ireland, Iceland, Latvia and the Netherlands, where observed attendance rates

23 were greater than 50% of predicted. However, there was considerable overlap between all

24 sites when 95% confidence intervals were considered. Results of the Poisson models suggest

25 that attendances in Spring 2020 were higher in EDs in countries with lower SARS-CoV-2

1 prevalence (incidence rate ratio (IRR) 2·62, 95% CI 2·19 to 3·13) (Table 2). We found a  
2 relationship between the number of introduced organisational COVID-19 measures and ED  
3 attendances and more organisational COVID-19 measures were associated with lower  
4 numbers of ED attendances when adjusted for predicted ED attendances (IRR 0·13, 95% CI  
5 0·11 to 0·16, when sites with four or more measures were compared to sites with no  
6 measures). ED attendances across all age groups significantly reduced (S10 and S11 Figs).  
7 Attendances in children aged above 12 months were reduced more than children below 12  
8 months (12-<24 months IRR 0·89, 95% CI 0·86 to 0·92; 2-<5 years IRR 0·84, 95% CI 0·82 to  
9 0·87; 5-<12 years IRR 0·74, 95% CI 0·72 to 0·76; 12-<16 years IRR 0·74, 95% CI 0·71 to 0·77;  
10 vs. age <12 months as reference group) (Table 2). There was insufficient evidence to  
11 conclude that this pattern continued with increasing age for children aged 12 months and  
12 older. Patterns between sites within the same country appeared similar (S12 Fig) with  
13 strong evidence that between country differences were greater than within country  
14 differences (F value:6·453; p:0·002).

15

16 **Fig 2. Observed and predicted in % for the number of total emergency department**  
17 **attendances.**

18 Legend:

19 The observed and predicted number of children presenting to emergency departments in  
20 countries across Europe in the weeks following February 2<sup>nd</sup> 2020 until May 11<sup>th</sup> 2020, for all  
21 sites combined. The colour and the size of the dots reflect the actual number of ED  
22 attendances for each site and for each time window. The line connects the mean of the  
23 observed vs predicted point estimates for each of the individual sites for each time window.

24

1  
2

**Table 1. Summary data on the lowest observed number of ED attendances during COVID-19 for each participating centre**

| Site    | Week of first public health measure | Week of highest reduction | Observed number of ED attendances | Total % of predicted numbers (95% CI) | Overall reduction <sup>§</sup> | Date of Highest 14 day cumulative rate of new cases per 100·000 | Highest cumulative 14 day rate of new cases per 100·000 | Total changes to health system | Total changes as % of possible changes |
|---------|-------------------------------------|---------------------------|-----------------------------------|---------------------------------------|--------------------------------|-----------------------------------------------------------------|---------------------------------------------------------|--------------------------------|----------------------------------------|
| Austria | 09-03-2020                          |                           |                                   |                                       | 75%                            | 2020-04-02                                                      | 102·33                                                  |                                |                                        |
| AUS001  |                                     | 13/04/2020                | 16                                | 5% (5% - 6%)*                         | 85%                            |                                                                 |                                                         | 5                              | 13·5%                                  |
| AUS003  |                                     | 30/03/2020                | 119                               | 17% (15% - 18%)                       | 72%                            |                                                                 |                                                         | 1                              | 2·7%                                   |
| AUS004  |                                     | 30/03/2020                | 114                               | 21% (19% - 23%)                       | 71%                            |                                                                 |                                                         | 0                              | 0·0%                                   |
| France  | 24-02-2020                          |                           |                                   |                                       | 18%                            | 2020-04-11                                                      | 86·12                                                   |                                |                                        |
| FR001   |                                     | 30/03/2020                | 470                               | 41% (35% - 48%)                       | 28%                            |                                                                 |                                                         | 2                              | 5·3%                                   |
| FR002   |                                     | 30/03/2020                | 154                               | 52% (40% - 77%)                       | -6%                            |                                                                 |                                                         | 1                              | 2·6%                                   |
| FR003   |                                     | 30/03/2020                | 285                               | 42% (36% - 49%)                       | 28%                            |                                                                 |                                                         | 0                              | 0·0%                                   |
| FR004   |                                     | 13/04/2020                | 115                               | 34% (27% - 48%)                       | 23%                            |                                                                 |                                                         | 0                              | 0·0%                                   |
| Germany | 02-03-2020                          |                           |                                   |                                       |                                | 2020-04-09                                                      | 86·36                                                   |                                |                                        |
| GER001  |                                     | 30/03/2020                | 165                               | 36% (33% - 39%)                       | 53%                            |                                                                 |                                                         | 0                              | 0·0%                                   |
| Hungary | 09-03-2020                          |                           |                                   |                                       |                                | 2020-04-23                                                      | 13·34                                                   |                                |                                        |
| HUN001  |                                     | 23/03/2020                | 279                               | 35% (33% - 37%)                       | 52%                            |                                                                 |                                                         | 4                              | 10·5%                                  |
| Iceland | 16-03-2020                          |                           |                                   |                                       |                                | 2020-04-03                                                      | 277·04                                                  |                                |                                        |
| ICE001  |                                     | 06/04/2020                | 132                               | 49% (44% - 55%)                       | 40%                            |                                                                 |                                                         | 3                              | 7·9%                                   |
| Ireland | 09-03-2020                          |                           |                                   |                                       | 56%                            | 2020-04-23                                                      | 213·02                                                  |                                |                                        |
| IRE001  |                                     | 23/03/2020                | 404                               | 50% (46% - 55%)                       | 27%                            |                                                                 |                                                         | 3                              | 7·9%                                   |
| IRE002  |                                     | 30/03/2020                | 333                               | 32% (28% - 36%)                       | 55%                            |                                                                 |                                                         | 4                              | 10·5%                                  |
| IRE003  |                                     | 30-03-2020                | 0                                 | 0% <sup>+</sup>                       | 86%                            |                                                                 |                                                         | 13                             | 34·2%                                  |
| Italy   | 02-03-2020                          |                           |                                   |                                       | 70%                            | 2020-04-02                                                      | 124·03                                                  |                                |                                        |
| IT001   |                                     | 23/03/2020                | 105                               | 20% (20% - 21%)                       | 67%                            |                                                                 |                                                         | 1                              | 2·6%                                   |
| IT002   |                                     | 23/03/2020                | 36                                | 12% (11% - 13%)                       | 73%                            |                                                                 |                                                         | 8                              | 21·1%                                  |



|                 |            |            |     |                  |     |            |        |   |       |
|-----------------|------------|------------|-----|------------------|-----|------------|--------|---|-------|
| Latvia          | 16-03-2020 |            |     |                  |     | 2020-04-06 | 20-52  |   |       |
| LAT001          |            | 30/03/2020 | 491 | 38% (37% - 39%)  | 53% |            |        | 0 | 0-0%  |
| Lithuania       | 09-03-2020 |            |     |                  |     | 2020-04-04 | 25-12  |   |       |
| LIT001          |            | 30/03/2020 | 164 | 26% (24% - 27%)  | 62% |            |        | 9 | 23-7% |
| Malta           | 09-03-2020 |            |     |                  |     | 2020-04-12 | 46-20  |   |       |
| MAL001          |            | 30/03/2020 | 68  | 13% (12% - 15%)  | 80% |            |        | 1 | 2-7%  |
| The Netherlands | 09-03-2020 |            |     |                  |     | 2020-04-19 | 86-57  |   |       |
| NL001           |            | 16/03/2020 | 38  | 36% (33% - 38%)  | 44% |            |        | 1 | 2-7%  |
| Portugal        | 09-03-2020 |            |     |                  | 71% | 2020-04-11 | 109-02 |   |       |
| POR001          |            | 13/04/2020 | 305 | 25% (23% - 28%)  | 70% |            |        | 1 | 2-6%  |
| POR003          |            | 30/03/2020 | 365 | 22% (20% - 24%)  | 70% |            |        | 2 | 5-3%  |
| POR004          |            | 30/03/2020 | 132 | 13% (12% - 15%)  | 74% |            |        | 6 | 15-8% |
| POR005          |            | 20/04/2020 | 117 | 21% (18% - 23%)  | 69% |            |        | 1 | 2-6%  |
| Slovenia        | 02-03-2020 |            |     |                  |     | 2020-04-05 | 28-55  |   |       |
| SLO001          |            | 30/03/2020 | 12  | 8% (7% - 8%)     | 74% |            |        | 3 | 7-9%  |
| Spain           | 09-03-2020 |            |     |                  | 70% | 2020-04-05 | 217-56 |   |       |
| SP001           |            | 23/03/2020 | 256 | 26% (24% - 28%)  | 62% |            |        | 1 | 2-6%  |
| SP002           |            | 30/03/2020 | 51  | 11% (10% - 11%)  | 77% |            |        | 0 | 0-0%  |
| Sweden          | 09-03-2020 |            |     |                  | 36% | 2020-05-01 | 83-60  |   |       |
| SWE001          |            | 30/03/2020 | 661 | 56% (52% - 60%)^ | 31% |            |        | 0 | 0-0%  |
| SWE002          |            | 06/04/2020 | 253 | 48% (44% - 52%)  | 40% |            |        | 0 | 0-0%  |
| Turkey          | 09-03-2020 |            |     |                  | 68% | 2020-04-22 | 74-97  |   |       |
| TUR001          |            | 27/04/2020 | 98  | 33% (29% - 38%)  | 59% |            |        | 3 | 7-9%  |
| TUR002          |            | 06/04/2020 | 233 | 15% (14% - 17%)  | 72% |            |        | 6 | 15-8% |
| TUR003          |            | 13/04/2020 | 882 | 14% (13% - 15%)  | 75% |            |        | 5 | 13-5% |
| United Kingdom  | 16-03-2020 |            |     |                  | 63% | 2020-05-01 | 99-25  |   |       |
| UK001           |            | 30/03/2020 | 387 | 30% (28% - 32%)  | 63% |            |        | 3 | 7-9%  |

|       |            |     |                 |     |                                                                                     |   |      |
|-------|------------|-----|-----------------|-----|-------------------------------------------------------------------------------------|---|------|
| UK002 | 30/03/2020 | 72  | 18% (17% - 21%) | 71% |  | 3 | 7.9% |
| UK004 | 23/03/2020 | 487 | 36% (34% - 39%) | 55% |                                                                                     | 2 | 5.3% |
| UK005 | 13/04/2020 | 76  | 14% (12% - 17%) | 71% |                                                                                     | 1 | 2.6% |
| UK006 | 30/03/2020 | 401 | 33% (31% - 35%) | 54% |                                                                                     | 2 | 5.3% |

1  
2  
3  
4  
5  
6  
7  
8  
9  
10  
11

*Legend:*

The starting date of the week where the observed numbers of ED attendances had the largest difference from predicted numbers expressed in % with 95% confidence intervals. With \* AUS001 having the largest reduction from predicted numbers and ^ SWE001 the least change from predicted numbers. In addition, highest national SARS-CoV-2 infection rates are given for each of the study sites, as reported by the European Centre for Disease Control [20], with a threshold of 80 cases per 100.000 to indicate low (green) and high (orange) prevalence. Total changes to health system as per Rose et al.. [21]

<sup>§</sup>overall reduction calculated from introduction of first national public health measure until end of study period. If multiple sites per country, overall reduction for the country was estimated using the average of the overall reductions of each individual site.

<sup>+</sup> IRE003: was closed for pediatric attendances from 30-03-2020 onwards

HUN002, NL002 excluded from table owing to missing data in 2018

1 Table 2. Poisson regression models for ED attendances  
2

|                                                             | <b>Incidence Rate Ratio<br/>(95% Confidence Interval)</b> | <b><i>p value</i></b> |
|-------------------------------------------------------------|-----------------------------------------------------------|-----------------------|
| <b>Number of COVID-19 measures in hospital<sup>§</sup></b>  |                                                           |                       |
| No measures – reference group                               |                                                           |                       |
| 1 measure                                                   | 0.426 (0.391 to 0.463)                                    | <0.0001               |
| 2 measures                                                  | 0.760 (0.717 to 0.806)                                    | <0.0001               |
| 3 measures                                                  | 0.454 (0.413 to 0.499)                                    | <0.0001               |
| 4+ measures                                                 | 0.130 (0.108 to 0.155)                                    | <0.0001               |
| <b>SARS-CoV-2 prevalence<sup>^</sup></b>                    |                                                           |                       |
| Low prevalence                                              | 2.616 (2.197 to 3.144)                                    | <0.0001               |
| <b>Age Group</b>                                            |                                                           |                       |
| 0-<12 months – reference group                              |                                                           |                       |
| 12-<24 months                                               | 0.888 (0.859 to 0.917)                                    | <0.0001               |
| 2-<5 years                                                  | 0.841 (0.816 to 0.866)                                    | <0.0001               |
| 5-<12 years                                                 | 0.736 (0.712 to 0.761)                                    | <0.0001               |
| 12-16 years                                                 | 0.744 (0.714 to 0.773)                                    | <0.0001               |
| <b>Triage urgency classification</b>                        |                                                           |                       |
| Non-urgent and standard triage categories – reference group |                                                           |                       |
| Urgent                                                      | 1.096 (1.076 to 1.116)                                    | <0.0001               |
| Emergent and very urgent                                    | 1.530 (1.488 to 1.573)                                    | <0.0001               |
| <b>Diagnosis I</b>                                          |                                                           |                       |
| Appendicitis – reference group                              |                                                           |                       |
| Gastro-intestinal infections                                | 0.279 (0.253 to 0.308)                                    | <0.0001               |
| Minor head injury                                           | 0.783 (0.709 to 0.866)                                    | <0.0001               |
| LRTI                                                        | 0.357 (0.323 to 0.396)                                    | <0.0001               |
| Mental health issues                                        | 0.688 (0.609 to 0.777)                                    | <0.0001               |
| Otitis media                                                | 0.231 (0.206 to 0.260)                                    | <0.0001               |
| Radius fracture                                             | 0.732 (0.654 to 0.819)                                    | <0.0001               |
| Tonsillitis                                                 | 0.189 (0.172 to 0.208)                                    | <0.0001               |
| <b>Diagnosis II</b>                                         |                                                           |                       |
| Surgical presentation – appendicitis – reference group      |                                                           |                       |
| Communicable diseases                                       | 0.238 (0.253 to 0.308)                                    | <0.0001               |
| Other                                                       | 0.754 (0.709 to 0.866)                                    | <0.0001               |
| <b>Outcome</b>                                              |                                                           |                       |
| Admission – reference group                                 |                                                           |                       |
| Death                                                       | 1.749 (0.876 to 3.069)                                    | 0.077                 |
| PICU Admission                                              | 1.295 (1.157 to 1.445)                                    | <0.0001               |

3 <sup>§</sup> The number of changes made in each hospital in response to the pandemic as previously detailed by Rose et  
4 al.[21]

5 <sup>^</sup> Low prevalence countries were defined as a cumulative 14-day rate of ≤ 80 new cases per 100,000 of the  
6 population as per the European Centre for Disease Prevention and Control (ECDC) [20]

7 LRTI: lower respiratory tract infection, PICU: pediatric intensive care unit

## 8 Triage urgency

9 Overall, there was a higher impact (observed compared to predicted) in children  
10 with lower triage urgency when compared to children with high triage classification (urgent  
11 triage, IRR 1.10, 95% CI 1.08 to 1.12; emergent and very urgent triage IRR 1.53, 95% CI 1.49  
12 to 1.57; vs. non-urgent triage category), even though clear reductions were seen for all  
13 triage categories (S13 and S14 Figs).

14

## 15 Hospital and PICU admissions

16 Hospital and PICU admissions were fewer than predicted (Figs 3 and 4, S15 Fig). We  
17 did not observe an increase in the number of deaths in ED. The impact on PICU admissions  
18 (IRR 1.30, 95% CI 1.16 to 1.45) was not as great as the impact on general admissions.

19

20 **Fig 3. Observed and predicted in % for the number of hospital admissions for**  
21 **patients attending the emergency department.**

22 Legend:

23 The observed and predicted number of children admitted to hospital from the emergency  
24 department in countries across Europe in the weeks following February 2<sup>nd</sup> 2020 until May  
25 11<sup>th</sup> 2020, for all sites combined. The colour and the size of the dots reflect the actual  
26 number of ED attendances for each site and for each time window. The line connects the  
27 mean of the observed vs predicted point estimates for each of the individual sites for each  
28 time window.

29

30 **Fig 4. The 28-day mean number of hospital admissions, intensive care admissions**  
31 **and deaths in the emergency department for the period January – April over a**  
32 **three-year period.**

33 Legend:

34 Percentages of total ED attendances (left) and absolute numbers (right) of children admitted  
35 to hospital (top), pediatric intensive care units (middle), or died in the ED (bottom);  
36 comparing the 28-day mean numbers for the months of January – April for 2018 vs. 2019 vs.  
37 2020.

38

### 39 **Diagnoses**

40 The 28-day mean numbers for common communicable diseases decreased in  
41 absolute and relative frequencies (Table 3, Fig 5), in particular for tonsillitis, otitis media,  
42 gastro-intestinal infections and LRTIs. Decreases were also seen in common childhood  
43 injuries such as minor head injuries and radius fractures. No increase in absolute numbers  
44 were seen for several uncommon diagnoses suggested to be linked with SARS-CoV-2  
45 infection, such as diabetic ketoacidosis, intussusception and testicular torsion, even when  
46 stratified for high SARS-CoV-2 prevalence countries (S16 Fig). Mental health attendances  
47 declined during the first phase of the COVID-19 pandemic in absolute terms, but this  
48 corresponded with an increase in relative frequency. Fig 6, reflecting the observed vs  
49 predicted numbers for the eight selected diagnoses, shows that the impact on appendicitis  
50 was lower than on the other diagnoses groups. Mental health issues, radius fractures and  
51 minor head injuries were all affected, but there was evidence that attendances increased  
52 from the end of March. In contrast, attendances for LRTI, otitis media, gastro-intestinal  
53 infections and tonsillitis remained low. Poisson models showed no significant difference

54 between mental health, minor head trauma and radius fracture. There was evidence of  
55 significant difference between infections and trauma and mental health, with bigger  
56 reductions in infections. When communicable diseases were combined, there was a clear  
57 difference between surgical presentation (appendicitis), communicable diseases and 'other'  
58 (mental health, radius fracture and head trauma) (Table 2).

59

60 **Fig 5. The 28-day mean number of selected clinical diagnoses in the emergency**  
61 **department for the period January – April over a three-year period.**

62 Legend:

63 Percentages of total ED attendances (left) and absolute numbers (right) of children with  
64 diagnosis of a) tonsillitis, b) otitis media, c) lower respiratory tract infections (LRTI), d)  
65 gastro-intestinal (GI) infections, e) appendicitis, f) testicular torsion, g) intussusception,  
66 volvulus and malrotation (combined group), h) mental health issues, i) diabetic keto-  
67 acidosis, j) radius fracture, k) minor head injury; comparing the 28-day mean numbers for  
68 the months of January – April for 2018 vs. 2019 vs. 2020.

69

70 **Fig 6. Observed and predicted in % for the number of selected diagnoses.**

71 Legend:

72 The observed and predicted numbers of eight selected diagnoses for all sites combined, for  
73 the period following February 2<sup>nd</sup> 2020 until May 4<sup>th</sup> 2020.

74

1 Table 3. The 28-day mean numbers of selected clinical diagnoses in the emergency department for the period January – April over a three-year  
 2 period.  
 3

|                                           | 2018             |                  |                  |                  | 2019             |                  |                  |                  | 2020             |                  |                  |                |
|-------------------------------------------|------------------|------------------|------------------|------------------|------------------|------------------|------------------|------------------|------------------|------------------|------------------|----------------|
|                                           | January          | February         | March            | April            | January          | February         | March            | April            | January          | February         | March            | April          |
| Tonsillitis                               | 17627<br>(12.9%) | 16781<br>(12.9%) | 15249<br>(12.4%) | 14722<br>(12.0%) | 24939<br>(16.8%) | 16231<br>(12.1%) | 15898<br>(12.3%) | 18751<br>(14.6%) | 26118<br>(18.4%) | 17668<br>(14.0%) | 10639<br>(13.5%) | 2382<br>(6.3%) |
| Otitis Media                              | 4917<br>(3.6%)   | 4814<br>(3.7%)   | 4063<br>(3.3%)   | 3639<br>(3.0%)   | 4843<br>(3.3%)   | 4370<br>(3.2%)   | 3900<br>(3.0%)   | 3719<br>(2.9%)   | 4115<br>(2.9%)   | 4452<br>(3.5%)   | 2156<br>(2.7%)   | 407<br>(1.1%)  |
| Lower respiratory tract infections        | 9129<br>(6.7%)   | 8981<br>(6.9%)   | 7197<br>(5.8%)   | 5407<br>(4.4%)   | 10684<br>(7.2%)  | 10294<br>(7.7%)  | 6519<br>(5.1%)   | 5415<br>(4.2%)   | 9374<br>(6.6%)   | 9028<br>(7.2%)   | 5667<br>(7.2%)   | 1059<br>(2.8%) |
| Gastro-intestinal infections              | 7809<br>(5.7%)   | 8488<br>(6.5%)   | 8946<br>(7.3%)   | 9103<br>(7.4%)   | 10313<br>(6.9%)  | 9949<br>(7.4%)   | 11345<br>(8.8%)  | 11066<br>(8.6%)  | 9158<br>(6.4%)   | 8726<br>(6.9%)   | 4719<br>(6.0%)   | 1905<br>(5.1%) |
| Appendicitis                              | 399<br>(0.3%)    | 412<br>(0.3%)    | 434<br>(0.4%)    | 424<br>(0.3%)    | 455<br>(0.3%)    | 437<br>(0.3%)    | 505<br>(0.4%)    | 443<br>(0.3%)    | 431<br>(0.3%)    | 435<br>(0.3%)    | 332<br>(0.4%)    | 307<br>(0.8%)  |
| Testicular torsion                        | 119<br>(0.1%)    | 118<br>(0.1%)    | 124<br>(0.1%)    | 117<br>(0.1%)    | 143<br>(0.1%)    | 111<br>(0.1%)    | 147<br>(0.1%)    | 136<br>(0.1%)    | 125<br>(0.1%)    | 125<br>(0.1%)    | 99<br>(0.1%)     | 103<br>(0.3%)  |
| Intussusception, volvulus and malrotation | 33<br>(0.0%)     | 37<br>(0.0%)     | 56<br>(0.0%)     | 58<br>(0.0%)     | 40<br>(0.0%)     | 58<br>(0.0%)     | 63<br>(0.0%)     | 60<br>(0.0%)     | 55<br>(0.0%)     | 44<br>(0.0%)     | 53<br>(0.1%)     | 30<br>(0.1%)   |
| Mental health conditions                  | 705<br>(0.5%)    | 652<br>(0.5%)    | 718<br>(0.6%)    | 736<br>(0.6%)    | 811<br>(0.5%)    | 821<br>(0.6%)    | 853<br>(0.7%)    | 757<br>(0.6%)    | 791<br>(0.6%)    | 802<br>(0.6%)    | 603<br>(0.8%)    | 388<br>(1.0%)  |
| Diabetic keto-acidosis                    | 61<br>(0.0%)     | 60<br>(0.0%)     | 56<br>(0.0%)     | 64<br>(0.1%)     | 68<br>(0.0%)     | 54<br>(0.0%)     | 61<br>(0.0%)     | 62<br>(0.0%)     | 62<br>(0.0%)     | 64<br>(0.1%)     | 55<br>(0.1%)     | 50<br>(0.1%)   |
| Radius fracture                           | 783<br>(0.6%)    | 891<br>(0.7%)    | 853<br>(0.7%)    | 1311<br>(1.1%)   | 886<br>(0.6%)    | 1036<br>(0.8%)   | 1153<br>(0.9%)   | 1362<br>(1.1%)   | 809<br>(0.6%)    | 935<br>(0.7%)    | 730<br>(0.9%)    | 592<br>(1.6%)  |
| Minor head injury                         | 2709<br>(2.0%)   | 2976<br>(2.3%)   | 2985<br>(2.4%)   | 3392<br>(2.8%)   | 2682<br>(1.8%)   | 2730<br>(2.0%)   | 3043<br>(2.4%)   | 3169<br>(2.5%)   | 2372<br>(1.7%)   | 2415<br>(1.9%)   | 1728<br>(2.2%)   | 1472<br>(3.9%) |

4  
 5 *Legend:*  
 6 Absolute numbers (and % of total children seen in the ED) of children with diagnosis of a) tonsillitis, b) otitis media, c) lower respiratory tract infections, d) gastro-intestinal  
 7 infections, e) appendicitis, f) testicular torsion, g) intussusception, volvulus and malrotation, h) mental health issues, i) diabetic keto-acidosis, j) radius fracture, k) minor  
 8 head injury; comparing the 28-day mean numbers for the months of January – April for 2018 vs. 2019 vs. 2020.

1

## 2 **Sensitivity analyses**

3           The sensitivity analyses for the Poisson modelling without TUR003 resulted in IRRs  
4 slightly nearer to one, meaning all associations were slightly weaker. The impact on the  
5 coefficient for tonsillitis was notable, increasing the IRR from 0.19 (95% CI 0.17 to 0.21) to  
6 0.37 (95% CI 0.34 – 0.41). There was also a notable impact on the difference between PICU  
7 admissions and admissions in general, which were less significant when TUR003 was  
8 removed.

9

## 10 **Discussion**

11           Reductions in the numbers of children attending EDs were consistently seen across  
12 Europe during the first phase of the COVID-19 pandemic. There was variation between  
13 countries, but within countries patterns were similar. The levels to which ED attendances  
14 decreased appeared to be related to the introduction of infection prevention measures,  
15 changes made to local health systems and national SARS-CoV-2 prevalence. Reduced ED  
16 attendances were seen for all age groups, with smaller reductions in children aged below 1  
17 year. The impact was largest and sustained for communicable diseases, whereas other  
18 groups of diagnoses trended towards normal levels of ED attendances by the end of the  
19 study period after initial reduced ED attendance rates.

20

21           Our findings of reduced pediatric ED attendances are consistent with other studies  
22 from around the world. [6–10,22–24] The observed reduction in ED attendances will likely  
23 be multifactorial. For example, children with asthma often frequent EDs, but they had fewer



1 exacerbations needing ED visits during the first phase of the COVID-19 pandemic. Proposed  
2 reasons include reduced air pollution, reduced social mixing with exposures to viral trigger,  
3 and improved compliance with medication at home. [25,26]  
4

5 Earlier studies suggested that infection prevention measures may have resulted in  
6 delayed presentations to hospitals. [11,12][27–29] In our study, children with more severe  
7 conditions, as measured by triage urgency, need for hospital admission and PICU and death,  
8 continued to attend hospital more frequently compared to those with minor injuries and  
9 illnesses, although overall absolute numbers fell. This was in line with other studies  
10 reporting similar reductions in children with high triage urgency or need for hospital  
11 admission. [6,30–38]  
12

13 Defining the harm of delayed presentations, as well as establishing what contributed  
14 to a possible delay, can be difficult. [39] In an attempt to distinguish the delay in seeking  
15 care from harm sustained, Roland et al. concluded that only a minority (6 out of 51 (11.8%))  
16 of children with a potential delay in presentation were admitted to one of seven hospitals.  
17 [40] Contradictory conclusions have been reported for the delay in presentations and for  
18 potential harm sustained for diagnoses of appendicitis [41,42] and testicular torsion [43–  
19 46], portraying a picture that organising regional health care delivery is important to ensure  
20 continued access to paediatric urgent and emergency care during a pandemic. In addition,  
21 our data suggest that, despite overall falling ED attendances, presentations requiring  
22 surgical interventions remained stable, reiterating that access to surgical teams and the  
23 ability to perform emergent surgical procedures are crucial.  
24

1 Evidence is mounting that SARS-CoV-2 is directly involved in the pathogenesis of new  
2 onset diabetes. [47,48] Unsworth et al. first reported an increase of new onset type 1  
3 diabetes in children and a possible link with SARS-CoV-2 in the UK. [15] Additional cohort  
4 studies found divergent associations between SARS-CoV-2, new onset diabetes and  
5 decompensation of pre-existing diabetes. [49–52] Our data did not identify increased  
6 incidence of diabetic keto-acidosis during the first phase of the COVID-19 pandemic. It might  
7 well be that clusters of new onset diabetes can be found in high prevalence areas and that  
8 we failed to capture this in our study. Likewise, if SARS-CoV-2 acts as a precipitator, there  
9 might be a delay in the manifestation of new onset diabetes, and with reduced prevalence  
10 of typical viral triggers, this increase might only become apparent later in the pandemic.  
11 [53] We were not able to differentiate between new onset diabetes and decompensation of  
12 pre-existing diabetes.

13

14 We found a reduction of children with mental health conditions presenting to the  
15 EDs during the first phase of the COVID-19 pandemic in Europe, similar to findings from  
16 studies elsewhere. [8,54–57] This is unlikely to reflect the considerable mental health issues  
17 encountered in the wider pediatric and adolescent populations [58] and of the experiences  
18 later in the pandemic, with, amongst others, reported increases in eating disorders in  
19 children and young people. [59] Joyce et al observed an overall decrease in mental health  
20 issues in ED, albeit an increase in self harm and deliberate ingestions. [60] Despite the  
21 reduction in absolute numbers, there was an increase in the proportion of attendances  
22 attributable to mental health potentially contributing to the heightened awareness for  
23 mental health issues in the first COVID-19 wave.

24

1 Prior to the current COVID-19 pandemic, limited data were available describing the  
2 impact of infection prevention measures on urgent and emergency pediatric care in high  
3 income countries. One study found a decrease in respiratory infections of 42%and  
4 decreased ED attendances of 28% following school closures for an influenza outbreak in  
5 Israel. [61] Similar patterns were seen during the SARS outbreak in 2003, [62–64] and the  
6 MERS outbreak in 2015. [65] These studies also reported a larger impact in reduced ED  
7 utilisation for children than for adults. In contrast, the H1N1 influenza pandemic in 2009  
8 generally led to increased ED utilisation, with higher levels of acuity. [66–68] One previous  
9 study had reported reduced pediatric ED attendance rates for flu like illness and respiratory  
10 tract infections following school closures. [69] Another study reported increased pediatric  
11 ED attendance numbers following media reports on health threats of the H1N1 virus. [70]  
12 Altogether, previous evidence of infectious disease outbreaks suggests a similar impact on  
13 pediatric urgent and emergency care following the introduction of public health and  
14 infection prevention measures. However, this is to a lesser extent than what was observed  
15 with the COVID-19 pandemic, and one that is dependent on childhood susceptibility for the  
16 infectious pathogen.

17

## 18 **Strengths and limitations**

19 Our study presents multinational data enabling the comparison between infection  
20 prevention measures, national SARS-CoV-2 prevalenceand the impact on acute illness and  
21 injuries in children between European countries. Most participating sites were tertiary  
22 institutions, with dedicated pediatric emergency medicine teams, with potential  
23 implications for the generalisability of our findings. At present, no standardized data

1 extraction system for pediatric urgent and emergency care exists between European  
2 countries; and the EPISODES study is the first to navigate the difficulties of dealing with  
3 different data systems, data availability and varying coding practices. Hence, also limited by  
4 the time restrictions caused by the COVID-19 pandemic, some sites were not able to provide  
5 data for all domains, and two sites (NL002, HUN002) were only able to provide data for part  
6 of the study duration.

7

8           Limitations of electronic health records to describe patients' diagnoses are well  
9 known. [71] Participating study sites had unique coding systems, and we urged all study  
10 teams to be consistent in transforming local data to fit the study clinical report form.

11 Although most diagnoses linked to SARS-CoV-2 in children were included in the pre-defined  
12 clinical report form, other diagnoses might be of interest in future studies. Of note, coding  
13 for children with Multi Inflammatory Syndrome in Children (MIS-C) proved unreliable, with  
14 no unique diagnostic codes available for this new disease in automated coding systems.

15

16           As the data were collected in aggregated form, thereby negating some of the  
17 difficulties with data protection regulations, we were not able to stratify for severity of  
18 specific diagnosis or age groups. We observed large differences between sites for the  
19 number of annual ED attendances and the number of patients with high triage urgency and  
20 hospital admissions, reflecting both case-mix and diversity of patient management. We  
21 analysed data mostly on a site-by-site basis, by using predicted versus observed ratios, and  
22 thus dealing with heterogeneity between sites.

23

1 We used the cumulative 14-day rate of new cases per 100,000 of the population to  
2 identify high prevalence countries, but indications for SARS-CoV-2 testing differed between  
3 countries, and this could have led to under- or overestimation of national prevalence rates.  
4 Moreover, national prevalence numbers might wrongly reflect any regional variation, but,  
5 for example, in the UK, identical patterns in ED attendances were seen across the five sites,  
6 despite large variations in SARS-CoV-2 prevalence during the first phase of the COVID-19  
7 pandemic (S17 Fig).

8

## 9 **Conclusion**

10 Reductions in overall ED attendances were seen across our study sites during the  
11 first phase of the COVID-19 pandemic, with health systems across Europe impacted  
12 similarly. In most sites, there was no suggestion of disproportionate numbers of more  
13 severely unwell children. In the first phase of the COVID-19 pandemic, the relative increase  
14 in cases of diabetic keto-acidosis or mental health issues might have contributed to a biased  
15 perception about increased occurrence, yet this is not supported by an increase in absolute  
16 numbers of cases in our data. Our study informs how pediatric emergency medicine can  
17 prepare for future pandemics, taking into account that different infectious diseases  
18 outbreaks can affect children differently, and illustrates the potential of electronic health  
19 records to monitor trends in urgent and emergency care for children.

20

## 1 **Data sharing statement**

2 All data used for this manuscript will be made available to others immediately following the  
3 time of publication with no end date.

## 5 **Conflict of interest**

6 Authors have no conflict of interest to declare

## 8 **Funding source**

9 RGN was supported by National Institute of Health Research, award number ACL-2018-021-  
10 007. The funders had no role in study design, data collection and analysis, decision to  
11 publish, or preparation of the manuscript.

## 13 **Author contributions**

14 The principal investigator for the EPISODES study is RN. RN, LT conceived and planned the  
15 study and worked alongside the EPISODES Steering Committee to establish the protocol and  
16 data collection for this study. RN, IM obtained sponsorship and ethical consent. RN, KH, SB,  
17 RO, HM, DB, ZB, RF, DR, HM were responsible for coordinating the study and approaching  
18 and training study sites; RO, SB, RN led on gaining REPEM network support. All authors were  
19 responsible for local data access, data collection, data cleaning and modification and  
20 obtaining the local approvals. RN, KH, SB, RO, HM, DB, ZB, RF, DR, HM were responsible for  
21 data analysis and interpretation. RN was responsible for writing the first draft of this  
22 manuscript with RF, KR, KH forming the initial writing group. All authors, as part of the  
23 EPISODES Steering group provided critical feedback and helped shape the research, analysis  
24 and manuscript. All authors had full access to the data, and all authors commented on and  
25 approved of the final version of this manuscript as submitted. RGN and KH verified all  
26 underlying data and act as guarantors for this study.

27

## 1 Acknowledgements

2 Celia Nekrouf (Pediatric Emergency Department, Hopital Universitaire Robert-Debre, Paris,  
3 France); Marcello Covino (Emergency Department, Fondazione Policlinico Universitario A.  
4 Gemelli IRCCS, Rome, Italy); Benita Lund (Medical Secretary; Pediatric emergency  
5 department, Sachs' Children and Youth Hospital, Stockholm, Sweden); Izabella Lottiger  
6 (Pediatric Emergency department, Astrid Lindgren Children Hospital, Stockholm, Sweden);  
7 Sharna Crosdale (Contracts office; Imperial College London, UK); Sarah Sheedy (Research  
8 nurse; Emergency Department, Bristol Royal Hospital for Children, Bristol, UK); James  
9 Allbones (Information & Performance Analyst; Birmingham Women's and Children's NHS  
10 Foundation Trust, UK), William Jones (University Hospitals of Leicester NHS Trust, UK);  
11 Frazer Snowdon and Matthew Ryan (Pediatric emergency department, Alder Hey Children's  
12 NHS Foundation Trust, Liverpool, UK), Carlos Saiz-Hernando (IT analyst; Department of  
13 Medical Documentation, Cruces University Hospital, Bilbao, Spain); Ellen Barry (research  
14 nurse; National Children's Research Centre, Dublin, Ireland) and Fiona Leonard (data  
15 analyst, Children's Health Ireland, Ireland) ; Ernst Eigenbauer (data analyst) and Katharina  
16 Lieb (medical student; Department of Pediatrics and Adolescent Medicine, Vienna, Austria);  
17 Sanne Vrijland (medical student; Erasmus MC – Sophia Children's hospital, Rotterdam, The  
18 Netherlands); Catarina Cordeiro (Pediatric Emergency Service, Hospital Pediátrico, Centro  
19 Hospitalar e Universitário de Coimbra, Portugal); Mark Camenzuli (Senior systems  
20 administrator; Mater Dei Hospital, Malta); Sandra Distefano (Clinical Performance Unit,  
21 Mater Dei Hospital, Malta); Karin Kittl-Mitteregger (HIS Management and Clinical Processes,  
22 Paracelsus Medical University, Salzburg, Austria); Marta Arpone (Research Assistant,  
23 University of Padova, Italy)  
24

## 1   **References**

- 2   1.    Götzinger F, Santiago-García B, Noguera-Julían A, Lanaspá M, Lancella L, Calò Carducci  
3       FI, et al. COVID-19 in children and adolescents in Europe: a multinational, multicentre  
4       cohort study. *Lancet Child Adolesc Heal* [Internet] 2020 Jun 29;**4**(9):653–61. Available  
5       from: [https://doi.org/10.1016/S2352-4642\(20\)30177-2](https://doi.org/10.1016/S2352-4642(20)30177-2)
- 6   2.    Swann O V., Holden KA, Turtle L, Pollock L, Fairfield CJ, Drake TM, et al. Clinical  
7       characteristics of children and young people admitted to hospital with covid-19 in  
8       United Kingdom: Prospective multicentre observational cohort study. Baillie JK,  
9       Semple MG, Openshaw PJM, Alex B, Bach B, Barclay WS, et al., editors. *BMJ* [Internet]  
10      2020;**370**. Available from: <https://www.bmj.com/content/370/bmj.m3249>
- 11  3.    Lu X, Zhang L, Du H, Zhang J, Li YY, Qu J, et al. SARS-CoV-2 Infection in Children. *N Engl*  
12      *J Med* [Internet] 2020 Mar 18;**382**(17):1663–5. Available from:  
13      <https://doi.org/10.1056/NEJMc2005073>
- 14  4.    Parri N, Lenge M, Buonsenso D. Children with Covid-19 in Pediatric Emergency  
15      Departments in Italy. *N Engl J Med* [Internet] 2020 May 1;**383**(2):187–90. Available  
16      from: <https://doi.org/10.1056/NEJMc2007617>
- 17  5.    DeBiasi RL, Song X, Delaney M, Bell M, Smith K, Pershad J, et al. Severe Coronavirus  
18      Disease-2019 in Children and Young Adults in the Washington, DC, Metropolitan  
19      Region. *J Pediatr* [Internet] 2020 Aug 1;**223**:199-203.e1. Available from:  
20      <https://doi.org/10.1016/j.jpeds.2020.05.007>
- 21  6.    Isba R, Edge R, Jenner R, Broughton E, Francis N, Butler J. Where have all the children  
22      gone? Decreases in pediatric emergency department attendances at the start of the  
23      COVID-19 pandemic of 2020. *Arch Dis Child* [Internet] 2020 May 5;**105**(7):704.  
24      Available from: [http://adc.bmj.com/content/early/2020/05/05/archdischild-2020-](http://adc.bmj.com/content/early/2020/05/05/archdischild-2020-319385.abstract)  
25      319385.abstract
- 26  7.    Angoulvant F, Ouldali N, Yang DD, Filser M, Gajdos V, Rybak A, et al. Coronavirus  
27      Disease 2019 Pandemic: Impact Caused by School Closure and National Lockdown on  
28      Pediatric Visits and Admissions for Viral and Nonviral Infections - A Time Series  
29      Analysis. *Clin Infect Dis* [Internet] 2021;**72**(2):319–22. Available from:  
30      <https://doi.org/10.1093/cid/ciaa710>
- 31  8.    Finkelstein Y, Maguire B, Zemek R, Osmanlliu E, Kam AJ, Dixon A, et al. Effect of the



- 1 COVID-19 Pandemic on Patient Volumes, Acuity, and Outcomes in Pediatric  
2 Emergency Departments: A Nationwide Study. *Pediatr Emerg Care* 2021  
3 Jun;**37**(8):427–34.
- 4 9. Kruizinga MD, Peeters D, van Veen M, van Houten M, Wieringa J, Noordzij JG, et al.  
5 The impact of lockdown on pediatric ED visits and hospital admissions during the  
6 COVID19 pandemic: a multicenter analysis and review of the literature. *Eur J Pediatr*  
7 2021 Jul;**180**(7):2271–9.
- 8 10. DeLaroche AM, Rodean J, Aronson PL, Fleegler EW, Florin TA, Goyal M, et al. Pediatric  
9 emergency department visits at US children’s hospitals during the COVID-19  
10 pandemic. *Pediatrics* [Internet] 2021;**147**(4). Available from:  
11 <https://pediatrics.aappublications.org/content/147/4/e2020039628>
- 12 11. Lynn RM, Avis JL, Lenton S, Amin-Chowdhury Z, Ladhani SN. Delayed access to care  
13 and late presentations in children during the COVID-19 pandemic: A snapshot survey  
14 of 4075 paediatricians in the UK and Ireland. *Arch Dis Child* [Internet]  
15 2021;**106**(2):archdischild-2020-319848. Available from:  
16 <https://adc.bmj.com/content/early/2020/06/24/archdischild-2020-319848>
- 17 12. Lazzerini M, Barbi E, Apicella A, Marchetti F, Cardinale F, Trobia G. Delayed access or  
18 provision of care in Italy resulting from fear of COVID-19. *Lancet Child Adolesc Heal*  
19 [Internet] 2020 May 1;**4**(5):e10–1. Available from: [https://doi.org/10.1016/S2352-](https://doi.org/10.1016/S2352-4642(20)30108-5)  
20 [4642\(20\)30108-5](https://doi.org/10.1016/S2352-4642(20)30108-5)
- 21 13. Honeyford K, Coughlan C, Nijman RG, Expert P, Burcea G, Maconochie I, et al.  
22 Changes in emergency department activity and the first covid-19 lockdown: A cross-  
23 sectional study. *West J Emerg Med* 2021 May;**22**(3):603–7.
- 24 14. Royal College for Paediatrics and Child Health. Advice for parents and young people  
25 during coronavirus - posters [Internet]. 2020. Available from:  
26 [https://www.rcpch.ac.uk/resources/advice-parents-young-people-during-](https://www.rcpch.ac.uk/resources/advice-parents-young-people-during-coronavirus-posters)  
27 [coronavirus-posters](https://www.rcpch.ac.uk/resources/advice-parents-young-people-during-coronavirus-posters)
- 28 15. Unsworth R, Wallace S, Oliver NS, Yeung S, Kshirsagar A, Naidu H, et al. New-onset  
29 type 1 diabetes in children during COVID-19: Multicenter regional findings in the U.K.  
30 Vol. 43, *Diabetes Care*. United States; 2020.**43**(11) p. e170–1.
- 31 16. Giovanni JE, Hrapcak S, Melgar M, Godfred-Cato S. Global Reports of Intussusception  
32 in Infants with SARS-CoV-2 Infection. *Pediatr Infect Dis J* 2020 Jan;**40**(1):35–6.

- 1 17. Orben A, Tomova L, Blakemore SJ. The effects of social deprivation on adolescent  
2 development and mental health. *Lancet Child Adolesc Heal* 2020 Aug;**4**(8):634–40.
- 3 18. Newlove-Delgado T, McManus S, Sadler K, Thandi S, Vizard T, Cartwright C, et al. Child  
4 mental health in England before and during the COVID-19 lockdown. *The Lancet*  
5 *Psychiatry* [Internet] 2021 May 1;**8**(5):353–4. Available from:  
6 [https://doi.org/10.1016/S2215-0366\(20\)30570-8](https://doi.org/10.1016/S2215-0366(20)30570-8)
- 7 19. Bressan S, Buonsenso D, Farrugia R, Parri N, Oostenbrink R, Titomanlio L, et al.  
8 Preparedness and Response to Pediatric COVID-19 in European Emergency  
9 Departments: A Survey of the REPEM and PERUKI Networks. *Ann Emerg Med*  
10 [Internet] 2020 Jun 21;**76**(6):788–800. Available from:  
11 <https://doi.org/10.1016/j.annemergmed.2020.05.018>
- 12 20. European Centre for Disease Prevention and Control. COVID-19 [Internet]. 2020.  
13 Available from: <https://www.ecdc.europa.eu/en/covid-19>
- 14 21. Rose K, Bressan S, Honeyford K, Bognar Z, Buonsenso D, Da Dalt L, et al. Responses of  
15 paediatric emergency departments to the first wave of the COVID-19 pandemic in  
16 Europe: a cross-sectional survey study. Rybak A, Simões AS, Chiaretti A, Haraldsson A,  
17 Gomez B, Aupiais C, et al., editors. *BMJ Paediatr Open* [Internet] 2021;**5**(1). Available  
18 from: <https://bmjpaedsopen.bmj.com/content/5/1/e001269>
- 19 22. Keyes D, Hardin B, Sweeney B, Shedden K. Change in urban and non-urban pattern of  
20 ED use during the COVID-19 pandemic in 28 Michigan hospitals: An observational  
21 study. *BMJ Open* [Internet] 2021;**11**(2). Available from:  
22 <https://bmjopen.bmj.com/content/11/2/e043024>
- 23 23. Pines JM, Zocchi MS, Black BS, Carlson JN, Celedon P, Moghtaderi A, et al.  
24 Characterizing pediatric emergency department visits during the COVID-19 pandemic.  
25 *Am J Emerg Med* [Internet] 2021;**41**:201–4. Available from:  
26 <https://www.sciencedirect.com/science/article/pii/S0735675720310615>
- 27 24. Westgard BC, Morgan MW, Vazquez-Benitez G, Erickson LO, Zwank MD. An Analysis  
28 of Changes in Emergency Department Visits After a State Declaration During the Time  
29 of COVID-19. *Ann Emerg Med* 2020 Nov;**76**(5):595–601.
- 30 25. Gupta A, Bush A, Nagakumar P. Asthma in children during the COVID-19 pandemic:  
31 lessons from lockdown and future directions for management. Vol. 8, *The Lancet*  
32 *Respiratory Medicine*. 2020.**8**(11) p. 1070–1.

- 1 26. Taquechel K, Diwadkar AR, Sayed S, Dudley JW, Grundmeier RW, Kenyon CC, et al.  
2 Pediatric Asthma Health Care Utilization, Viral Testing, and Air Pollution Changes  
3 During the COVID-19 Pandemic. *J Allergy Clin Immunol Pract* 2020;**8**(10):3378-  
4 3387.e11.
- 5 27. Valitutti F, Zenzeri L, Mauro A, Pacifico R, Borrelli M, Muzzica S, et al. Effect of  
6 Population Lockdown on Pediatric Emergency Room Demands in the Era of COVID-19.  
7 *Front Pediatr* 2020;**8**:521.
- 8 28. Raucci U, Musolino AM, Di Lallo D, Piga S, Barbieri MA, Pisani M, et al. Impact of the  
9 COVID-19 pandemic on the Emergency Department of a tertiary children's hospital.  
10 *Ital J Pediatr* 2021 Jan;**47**(1):21.
- 11 29. Isba R, Edge R, Auerbach M, Cicero MX, Jenner R, Setzer E, et al. COVID-19:  
12 Transatlantic declines in pediatric emergency admissions. *Pediatr Emerg Care* 2020  
13 Nov;**36**(11):551–3.
- 14 30. Vierucci F, Bacci C, Mucaria C, Dini F, Federico G, Maielli M, et al. How COVID-19  
15 Pandemic Changed Children and Adolescents Use of the Emergency Department: the  
16 Experience of a Secondary Care Pediatric Unit in Central Italy. *SN Compr Clin Med*  
17 2020 Sep;**2**(11):1959–69.
- 18 31. Morello F, Bima P, Ferreri E, Chiarlo M, Balzaretto P, Tirabassi G, et al. After the first  
19 wave and beyond lockdown: long-lasting changes in emergency department visit  
20 number, characteristics, diagnoses, and hospital admissions. *Intern Emerg Med* 2021  
21 Mar;**16**(6):1683–90.
- 22 32. Shanmugavadivel D, Liu JF, Gilhooley C, Elsaadany L, Wood D. Changing patterns of  
23 emergency paediatric presentations during the first wave of COVID-19: Learning for  
24 the second wave from a UK tertiary emergency department. *BMJ Paediatr Open*  
25 2021;**5**(1):e000967.
- 26 33. Sano K, Nakamura M, Ninomiya H, Kobayashi Y, Miyawaki A. Large decrease in  
27 paediatric hospitalisations during the COVID-19 outbreak in Japan. *BMJ Paediatr*  
28 *Open* 2021;**5**(1):e001013.
- 29 34. Raman R, Madhusudan M. Impact of the COVID-19 Pandemic on Admissions to the  
30 Pediatric Emergency Department in a Tertiary Care Hospital. Vol. 88, *Indian Journal of*  
31 *Pediatrics*. 2021.**88**(4) p. 392.
- 32 35. McIntosh A, Bachmann M, Siedner MJ, Gareta D, Seeley J, Herbst K. Effect of COVID-

- 1 19 lockdown on hospital admissions and mortality in rural KwaZulu-Natal, South  
2 Africa: Interrupted time series analysis. *BMJ Open* 2021 Mar;**11**(3):e047961.
- 3 36. McDonnell T, Nicholson E, Conlon C, Barrett M, Cummins F, Hensey C, et al. Assessing  
4 the impact of COVID-19 public health stages on paediatric emergency attendance. *Int*  
5 *J Environ Res Public Health* 2020 Sep;**17**(18):1–25.
- 6 37. Dann L, Fitzsimons J, Gorman KM, Hourihane J, Okafor I. Disappearing act: COVID-19  
7 and paediatric emergency department attendances. *Arch Dis Child* [Internet]  
8 2020;**105**(8):810–1. Available from: <https://adc.bmj.com/content/105/8/810>
- 9 38. Chong SL, Soo JSL, Allen JC, Ganapathy S, Lee KP, Tyebally A, et al. Impact of COVID-19  
10 on pediatric emergencies and hospitalizations in Singapore. *BMC Pediatr* 2020  
11 Dec;**20**(1):562.
- 12 39. Roland D, Nijman RG, Ponmani C, Munro APS. Arriving late, delayed, or not at all—  
13 presentations to paediatric emergency departments during covid-19 pandemic  
14 [Internet]. *Bmj*. 2020. Available from:  
15 [https://blogs.bmj.com/bmj/2020/08/15/arriving-late-delayed-or-not-at-all-](https://blogs.bmj.com/bmj/2020/08/15/arriving-late-delayed-or-not-at-all-presentations-to-paediatric-emergency-departments-during-covid-19-pandemic/)  
16 [presentations-to-paediatric-emergency-departments-during-covid-19-pandemic/](https://blogs.bmj.com/bmj/2020/08/15/arriving-late-delayed-or-not-at-all-presentations-to-paediatric-emergency-departments-during-covid-19-pandemic/)
- 17 40. Roland D, Harwood R, Bishop N, Hargreaves D, Patel S, Sinha I. Children’s emergency  
18 presentations during the COVID-19 pandemic. *J Clean Prod* [Internet] 2020 Jun 30;  
19 Available from: [https://doi.org/10.1016/S2352-4642\(20\)30206-6](https://doi.org/10.1016/S2352-4642(20)30206-6)
- 20 41. Delgado-Miguel C, Muñoz-Serrano AJ, Miguel-Ferrero M, De Ceano-Vivas M, Calvo C,  
21 Martínez L. Complicated Acute Appendicitis during COVID-19 Pandemic: The Hidden  
22 Epidemic in Children. *Eur J Pediatr Surg* 2021 Feb;
- 23 42. Gaitero Tristán J, Souto Romero H, Escalada Pellitero S, Espiñera CR, Andina Martín D,  
24 Espinosa Góngora R, et al. Acute Appendicitis in Children During the COVID-19  
25 Pandemic: Neither Delayed Diagnosis Nor Worse Outcomes. *Pediatr Emerg Care* 2021  
26 Mar;**37**(3):185–90.
- 27 43. Nelson CP, Kurtz MP, Logvinenko T, Venna A, McNamara ER. Timing and outcomes of  
28 testicular torsion during the COVID-19 crisis. *J Pediatr Urol* 2020 Dec;**16**(6):841.e1-  
29 841.e5.
- 30 44. Littman AR, Janssen KM, Tong L, Wu H, Wang MD, Blum E, et al. Did COVID-19 Affect  
31 Time to Presentation in the Setting of Pediatric Testicular Torsion? *Pediatr Emerg*  
32 *Care* 2021 Feb;**37**(2):123–5.

- 1 45. Holzman SA, Ahn JJ, Baker Z, Chuang K wen, Copp HL, Davidson J, et al. A multicenter  
2 study of acute testicular torsion in the time of COVID-19. *J Pediatr Urol* 2021 Mar;
- 3 46. Pogorelić Z, Milanović K, Veršić AB, Pasini M, Divković D, Pavlović O, et al. Is there an  
4 increased incidence of orchiectomy in pediatric patients with acute testicular torsion  
5 during COVID-19 pandemic?—A retrospective multicenter study. *J Pediatr Urol* 2021  
6 May;
- 7 47. Müller JA, Groß R, Conzelmann C, Krüger J, Merle U, Steinhart J, et al. SARS-CoV-2  
8 infects and replicates in cells of the human endocrine and exocrine pancreas. *Nat*  
9 *Metab* 2021 Feb;**3**(2):149–65.
- 10 48. Fignani D, Licata G, Brusco N, Nigi L, Grieco GE, Marselli L, et al. SARS-CoV-2 Receptor  
11 Angiotensin I-Converting Enzyme Type 2 (ACE2) Is Expressed in Human Pancreatic  $\beta$ -  
12 Cells and in the Human Pancreas Microvasculature. *Front Endocrinol (Lausanne)*  
13 2020;**11**:596898.
- 14 49. Salmi H, Heinonen S, Hästbacka J, Lääperi M, Rautiainen P, Miettinen PJ, et al. New-  
15 onset type 1 diabetes in Finnish children during the COVID-19 pandemic. *Arch Dis*  
16 *Child* 2021 May;
- 17 50. Tittel SR, Rosenbauer J, Kamrath C, Ziegler J, Reschke F, Hammersen J, et al. Did the  
18 COVID-19 lockdown affect the incidence of pediatric type 1 diabetes in Germany?  
19 Vol. 43, *Diabetes Care*. 2020.**43**(11) p. e172–3.
- 20 51. Rabbone I, Schiaffini R, Cherubini V, Maffei C, Scaramuzza A. Has covid-19 delayed  
21 the diagnosis and worsened the presentation of type 1 diabetes in children? *Diabetes*  
22 *Care* 2020 Nov;**43**(11):2870–2.
- 23 52. Jacob R, Weiser G, Krupik D, Takagi D, Peled S, Pines N, et al. Diabetic Ketoacidosis at  
24 Emergency Department Presentation During the First Months of the SARS-CoV-2  
25 Pandemic in Israel: A Multicenter Cross-Sectional Study. *Diabetes Ther* 2021  
26 May;**12**(5):1569–74.
- 27 53. Gottesman BL, Yu J, Tanaka C, Longhurst CA, Kim JJ. Incidence of New-Onset Type 1  
28 Diabetes Among US Children During the COVID-19 Global Pandemic. *JAMA Pediatr*  
29 [Internet] 2022; Available from: <https://doi.org/10.1001/jamapediatrics.2021.5801>
- 30 54. Leeb RT, Bitsko RH, Radhakrishnan L, Martinez P, Njai R, Holland KM. Mental Health–  
31 Related Emergency Department Visits Among Children Aged <18 Years During the  
32 COVID-19 Pandemic — United States, January 1–October 17, 2020. *MMWR Morb*

- 1 *Mortal Wkly Rep* 2020 Nov;**69**(45):1675–80.
- 2 55. Ougrin D, Wong BH ching, Vaezinejad M, Plener PL, Mehdi T, Romaniuk L, et al.  
3 Pandemic-related emergency psychiatric presentations for self-harm of children and  
4 adolescents in 10 countries (PREP-kids): a retrospective international cohort study.  
5 *Eur Child Adolesc Psychiatry* 2021 Mar;1–13.
- 6 56. Carr MJ, Steeg S, Webb RT, Kapur N, Chew-Graham CA, Abel KM, et al. Effects of the  
7 COVID-19 pandemic on primary care-recorded mental illness and self-harm episodes  
8 in the UK: a population-based cohort study. *Lancet Public Heal* 2021 Feb;**6**(2):e124–  
9 35.
- 10 57. Leff RA, Setzer E, Cicero MX, Auerbach M. Changes in pediatric emergency  
11 department visits for mental health during the COVID-19 pandemic: A cross-sectional  
12 study. *Clin Child Psychol Psychiatry* 2021 Jan;**26**(1):33–8.
- 13 58. Ford T, John A, Gunnell D. Mental health of children and young people during  
14 pandemic. *BMJ* [Internet] 2021;**372**. Available from:  
15 <https://www.bmj.com/content/372/bmj.n614>
- 16 59. Lin JA, Hartman-Munick SM, Kells MR, Milliren CE, Slater WA, Woods ER, et al. The  
17 Impact of the COVID-19 Pandemic on the Number of Adolescents/Young Adults  
18 Seeking Eating Disorder-Related Care. *J Adolesc Heal* 2021 Jul;**69**(4):660–3.
- 19 60. Joyce LR, Richardson SK, McCombie A, Hamilton GJ, Ardagh MW. Mental health  
20 presentations to Christchurch Hospital Emergency Department during COVID-19  
21 lockdown. *EMA - Emerg Med Australas* 2021 Apr;**33**(2):324–30.
- 22 61. Heymann A, Chodick G, Reichman B, Kokia E, Laufer J. Influence of school closure on  
23 the incidence of viral respiratory diseases among children and on health care  
24 utilization. *Pediatr Infect Dis J* 2004 Jul;**23**(7):675–7.
- 25 62. Boutis K, Stephens D, Lam K, Ungar WJ, Schuh S. The impact of SARS on a tertiary care  
26 pediatric emergency department. *Cmaj* 2004 Nov;**171**(11):1353–8.
- 27 63. Heiber M, Lou WYW. Effect of the SARS outbreak on visits to a community hospital  
28 emergency department. *Can J Emerg Med* 2006 Sep;**8**(5):323–8.
- 29 64. Huang HH, Yen DHT, Kao WF, Wang LM, Huang CI, Lee CH. Declining emergency  
30 department visits and costs during the severe acute respiratory syndrome (SARS)  
31 outbreak. *J Formos Med Assoc* 2006 Jan;**105**(1):31–7.
- 32 65. Paek SH, Kim DK, Lee JH, Kwak YH. The impact of middle east respiratory syndrome

- 1 outbreak on trends in emergency department utilization patterns. *J Korean Med Sci*  
2 2017 Oct;**32**(10):1576–80.
- 3 66. Progression and impact of the first winter wave of the 2009 pandemic H1N1 influenza  
4 in New South Wales, Australia. *Euro Surveill* 2009 Oct;**14**(42).
- 5 67. Graham J, Shirm S, Storm E, Lyle K, Linam WM, Romero J. Challenges and solutions:  
6 pandemic 2009 H1N1 influenza A in a pediatric emergency department. *Am J Disaster*  
7 *Med* 2011;**6**(4):211–8.
- 8 68. Blumental S, Huisman E, Cornet MC, Ferreiro C, De Schutter I, Reynders M, et al.  
9 Pandemic A/H1N1v influenza 2009 in hospitalized children: A multicenter Belgian  
10 survey. *BMC Infect Dis* 2011 Nov;**11**:313.
- 11 69. Copeland DL, Basurto-Davila R, Chung W, Kurian A, Fishbein DB, Szymanowski P, et al.  
12 Effectiveness of a school district closure for pandemic influenza A (H1N1) on acute  
13 respiratory illnesses in the community: A natural experiment. *Clin Infect Dis* 2013  
14 Feb;**56**(4):509–16.
- 15 70. McDonnell WM, Nelson DS, Schunk JE. Should we fear “flu fear” itself? Effects of  
16 H1N1 influenza fear on ED use. *Am J Emerg Med* 2012 Feb;**30**(2):275–82.
- 17 71. Armstrong BG. Effect of influenza vaccination on excess deaths occurring during  
18 periods of high circulation of influenza: Cohort study in elderly people (British  
19 Medical Journal (2004) 329 (660)). *BMJ* [Internet] 2010;**341**(7770):443. Available  
20 from: <https://www.bmj.com/content/341/bmj.c4226>

1 **Supporting information**

2

3 **S1 Table. Overview of participating study sites**

4

5 **S2 File. Clinical report form**

6

7 **S3 Table. List of time windows for data entry**

8

9 **S4 Fig. Spiderplot for availability of data**

10

11 **S5 Table. ICD-10 Guidance for coding of diagnosis**

12

13 **S6 Table. List of national social distancing measures**

14

15 **S7 Table. List of national SARS-CoV-2 rates**

16

17 Legend:

18 The dates and numbers of SARS-CoV2 infections in each of the study sites' countries  
19 participating in. the EPISODES study.

20

21 **S8 Table. List of approvals**

22

23 **S9 Fig. Annual emergency department attendance numbers in 2018 and 2019**

24

25 Legend:

26 The total number of pediatric emergency departments attendances for each of the study  
27 sites for 2018 and 2019 (pre-COVID-19). Overall, the numbers of ED attendances in 2018  
28 and 2019 were similar for each of the study sites, with considerable diversity between the  
29 study sites and TUR003 seeing more children in their ED than the other study sites.

30



1 **S10 Fig. Observed and predicted in % for the number of children for different age**  
2 **categories attending the emergency department**

3

4 Legend:

5 The observed and predicted number of children presenting to emergency departments in  
6 countries across Europe in the weeks following February 2<sup>nd</sup> 2020 until May 11<sup>th</sup> 2020, for all  
7 sites combined, for children a) aged 0-1 years, b) 1-2 years, c) 2-5 years, d) 5-12 years, e) 12  
8 – 16 years. The colour and the size of the dots reflect the actual number of ED attendances  
9 for each site and for each time window. The line connects the mean of the observed vs  
10 predicted point estimates for each of the individual sites for each time window.

11

12 **S11 Fig. Observed and predicted in % for the number of children for different age**  
13 **categories attending the emergency department for individual sites**

14

15 **S12 Fig. The observed and predicted (in %) of total ED attendances for each country.**

16

17 Legend:

18 The observed and predicted number of children presenting to emergency departments in  
19 countries across Europe for which data from only one study site were available in the weeks  
20 following February 2<sup>nd</sup> 2020 until May 11<sup>th</sup> 2020. A timeline is plotted (dashed line) to show  
21 the dates of the introduction of national social distancing measures.<sup>1</sup> One site from  
22 Netherlands and one site from Hungary were excluded from these analyses as these sites  
23 could not provide data for the entire study duration.

24

25 **S13 Fig. Observed and predicted in % for different triage categories of children attending**  
26 **the emergency department**

27

28 Legend:

29 The observed and predicted number of children presenting to emergency departments in  
30 countries across Europe in the weeks following February 2<sup>nd</sup> 2020 until May 11<sup>th</sup> 2020, for all  
31 sites combined, for children a) non urgent and standard triage classification, b) urgent triage

1 classification, c) emergency and very urgent triage classification. The colour and the size of  
2 the dots reflect the actual number of ED attendances for each site and for each time  
3 window. The line connects the mean of the observed vs predicted point estimates for each  
4 of the individual sites for each time window. UK001 did not use a triage system with the  
5 emergency and very urgent triage category.

6

7 **S14 Fig. Observed and predicted in % for the number of children for triage categories**  
8 **attending the emergency department for individual sites**

9

10 **S15 Fig. Percentage of children admitted to hospital**

11

12 Legend:

13 Percentages of total ED attendances (left) and absolute numbers (right) of children admitted  
14 to hospital (top) and pediatric intensive care units (bottom); comparing the 28-day  
15 standardized numbers for the months of January – April for 2018 vs. 2019 vs. 2020.

16

17 **S16 Fig. The 28-day mean number of selected clinical diagnoses in the emergency**  
18 **department for the period January – April over a three-year period, for high prevalence**  
19 **countries.**

20

21 Legend:

22 Percentages of total ED attendances (left) and absolute numbers (right) of children with  
23 diagnosis of a) tonsillitis, b) otitis media, c) lower respiratory tract infections (LRTI), d)  
24 gastro-intestinal (GI) infections, e) appendicitis, f) testicular torsion, g) intussusception, h)  
25 mental health issues, i) diabetic keto-acidosis, j) radius fracture, k) minor head injury;  
26 comparing the 28-day standardized numbers for the months of January – April for 2018 vs.  
27 2019 vs. 2020, shown for countries with of a cumulative 14 day rate of new SARS-CoV-2  
28 cases per 100.000 of 80 or more.

29

30 **S17 Fig. 14-day cumulative SARS-CoV-2 case rates for different UK regions**

31

1 Legend: the 14-day cumulative SARS-CoV-2 case rate in five different regions in the UK,  
2 corresponding with each of the five UK study sites, on May 1<sup>st</sup> 2020. Source:  
3 <https://coronavirus.data.gov.uk/details/download>  
4

Figure 1. Timelines of first phase of COVID-19 pandemic in participating countries

Legend:

Timelines of the introduction of national infection prevention measures ('Response measures'), as well as dates for the first and 1<sup>st</sup> 100 cases of SARS-CoV-2 for each of the countries participating in the EPISODES study. The black circle depicts the date of the highest 14 day cumulative rate of new SARS-CoV-2 cases per 100,000, with the size reflecting the actual case rate.

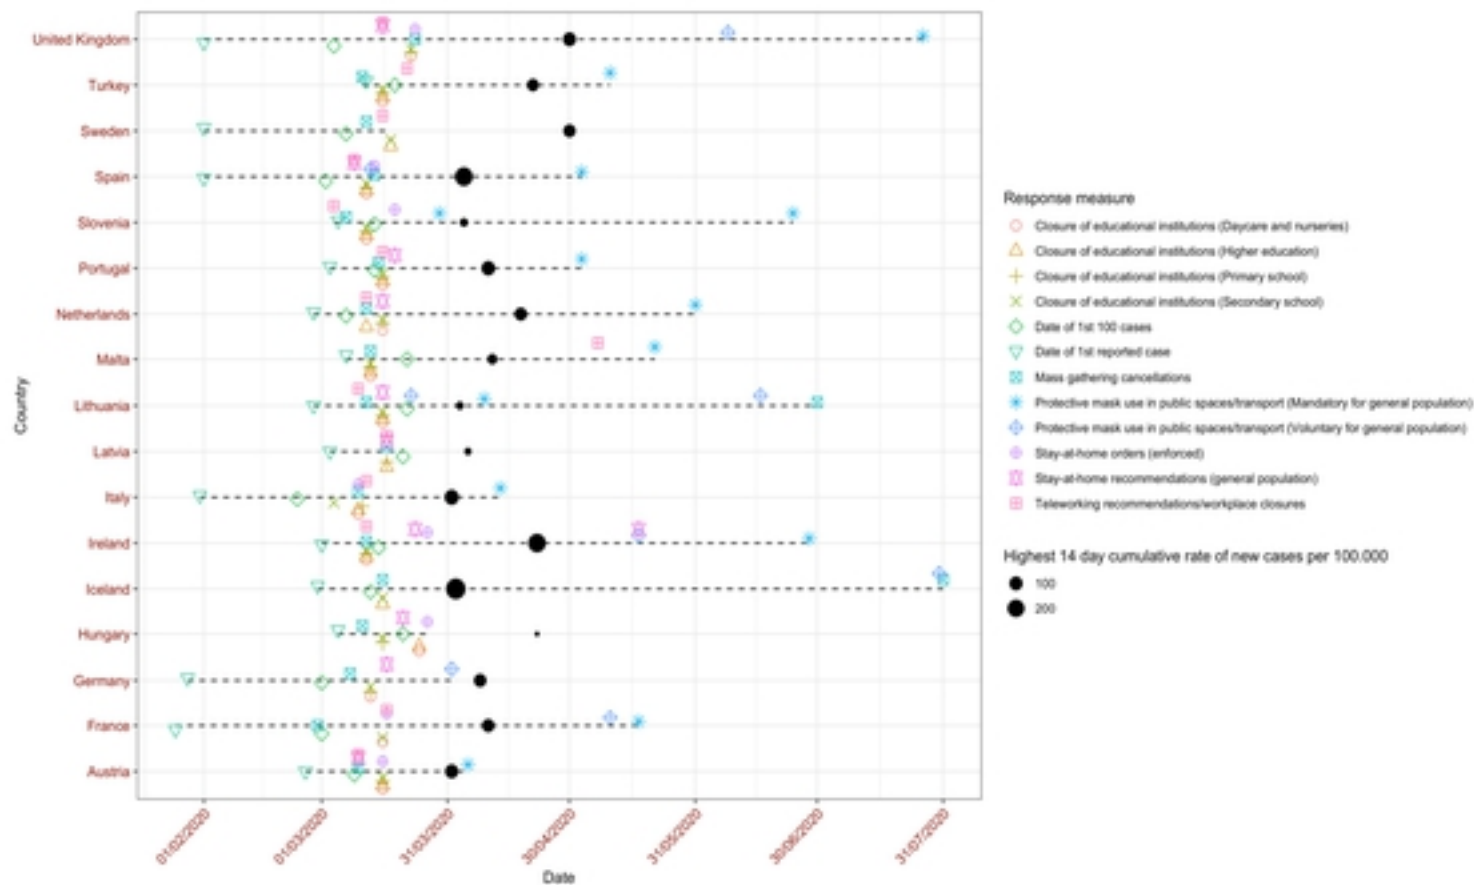

Figure 2. Observed and predicted in % for the number of total emergency department attendances.

Legend:

The observed and predicted number of children presenting to emergency departments in countries across Europe in the weeks following February 2<sup>nd</sup> 2020 until May 11<sup>th</sup> 2020, for all sites combined. The colour and the size of the dots reflect the actual number of ED attendances for each site and for each time window. The line connects the mean of the observed vs predicted point estimates for each of the individual sites for each time window.

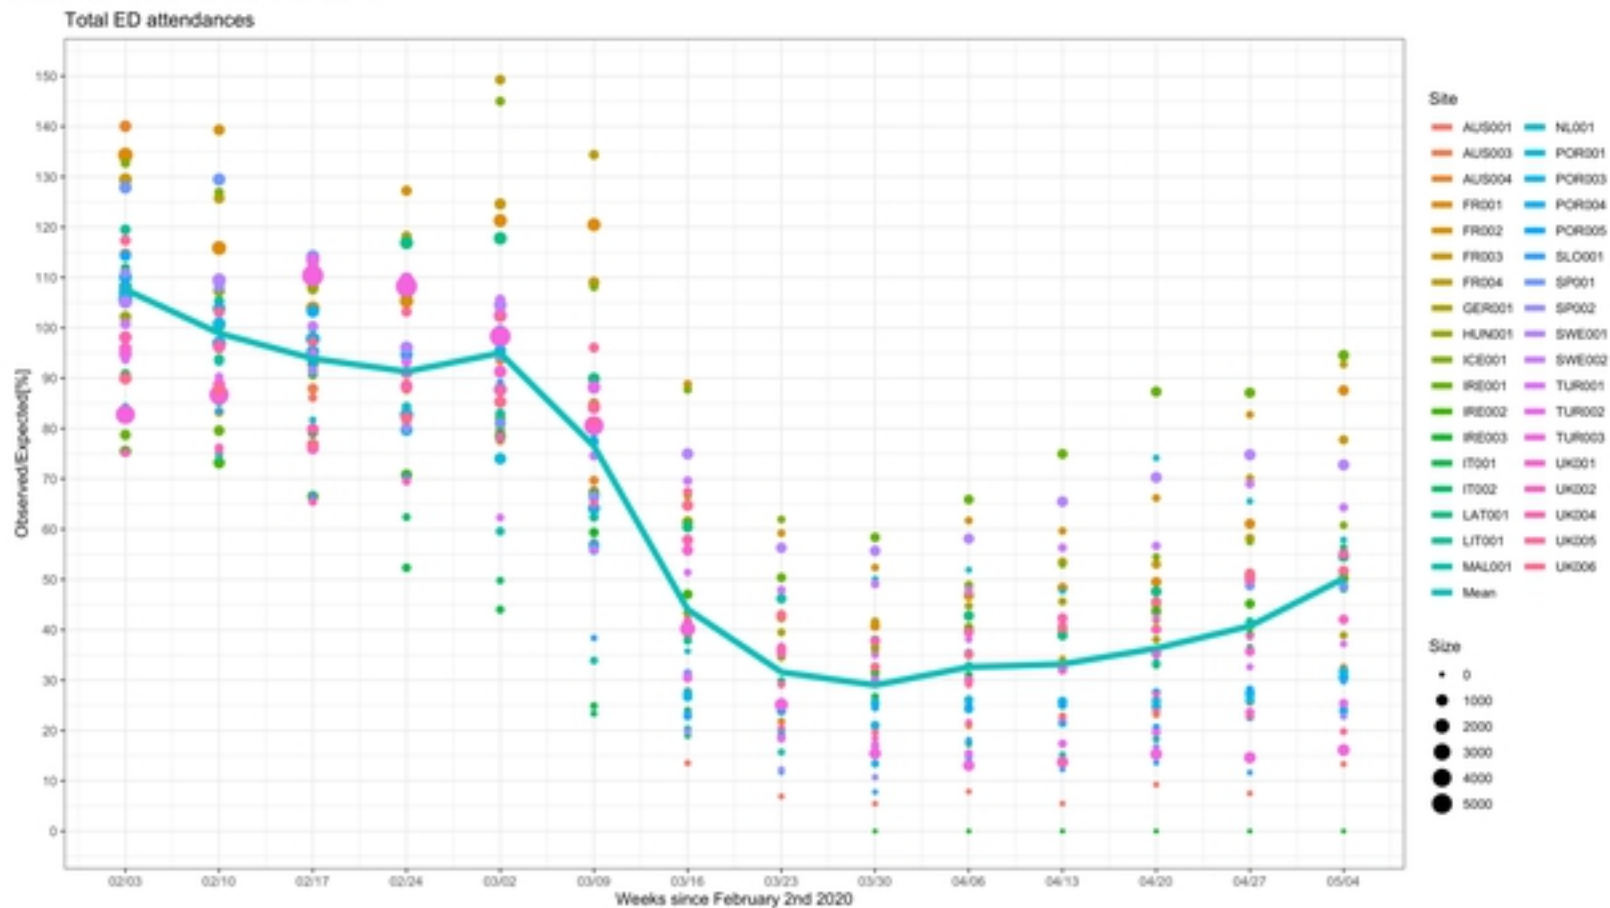

Figure 3. Observed and predicted in % for the number of hospital admissions for patients attending the emergency department.

Legend:

The observed and predicted number of children admitted to hospital from the emergency department in countries across Europe in the weeks following February 2<sup>nd</sup> 2020 until May 11<sup>th</sup> 2020, for all sites combined. The colour and the size of the dots reflect the actual number of ED attendances for each site and for each time window. The line connects the mean of the observed vs predicted point estimates for each of the individual sites for each time window.

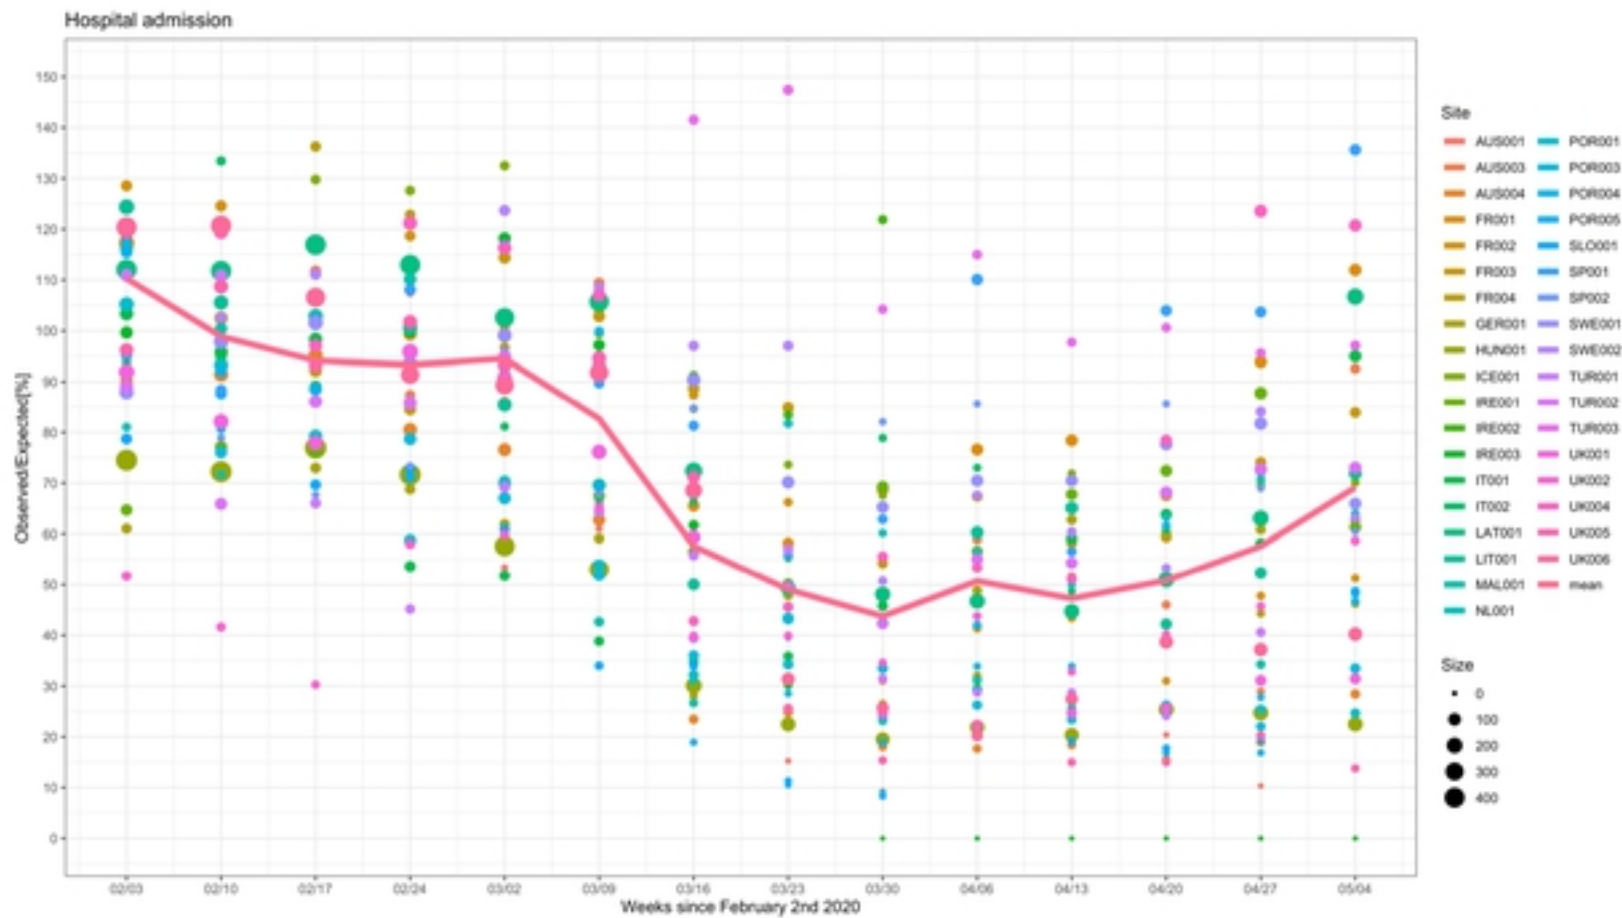

Figure 4. The 28-day mean number of hospital admissions, intensive care admissions and deaths in the emergency department for the period January – April over a three-year period.

Legend:

Percentages of total ED attendances (left) and absolute numbers (right) of children admitted to hospital (top), paediatric intensive care units (middle), or died in the ED (bottom); comparing the 28-day mean numbers for the months of January – April for 2018 vs. 2019 vs. 2020.

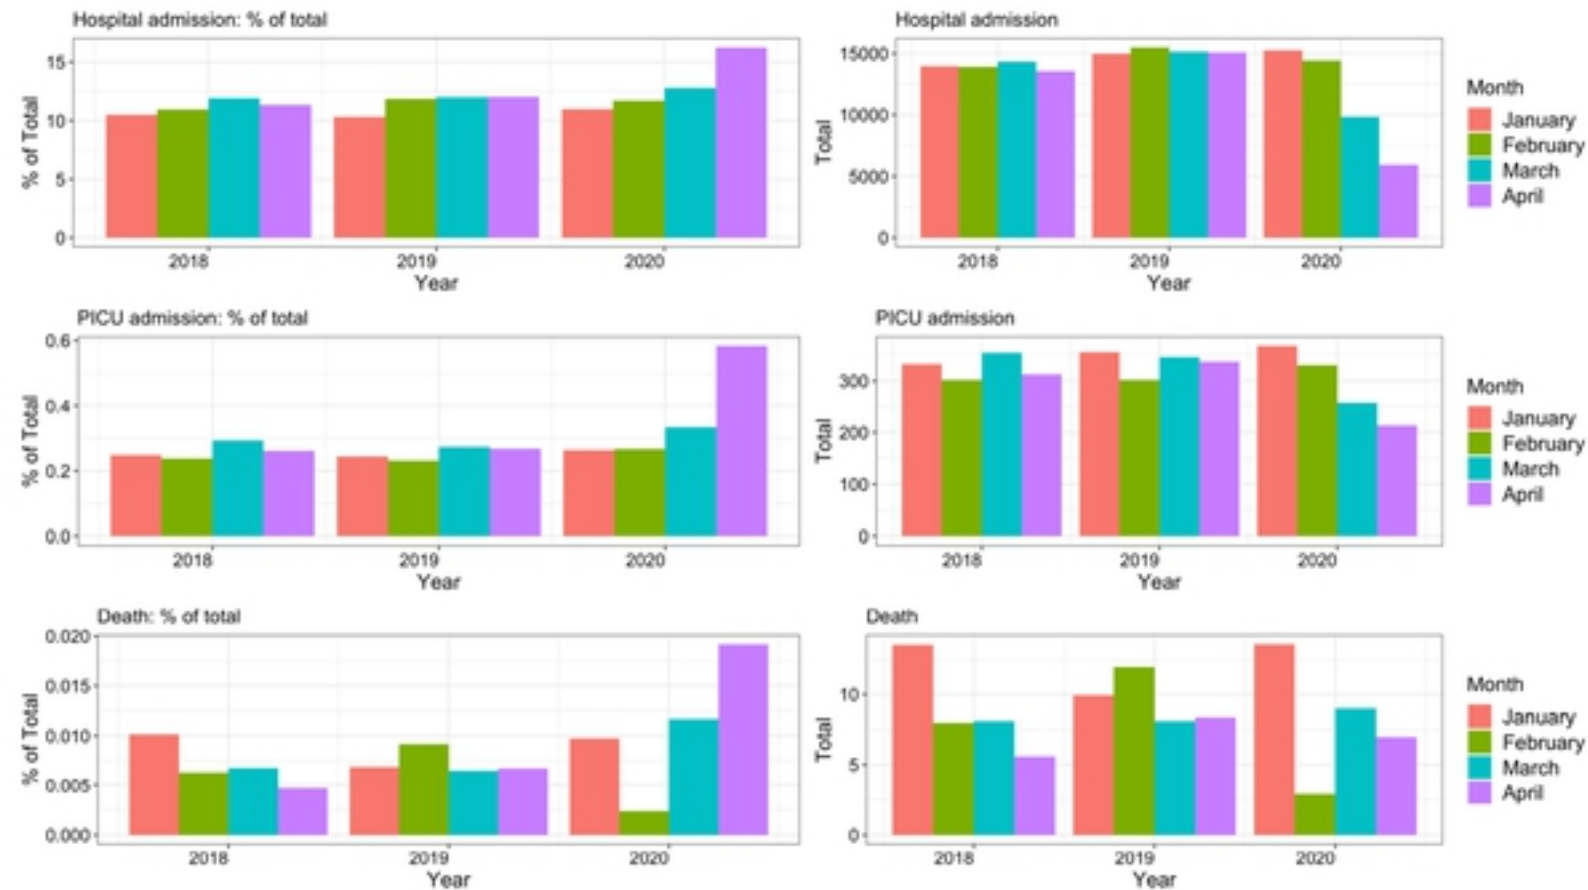

Figure 5. The 28-day mean number of selected clinical diagnoses in the emergency department for the period January – April over a three-year period.

**Legend:**

Percentages of total ED attendances (left) and absolute numbers (right) of children with diagnosis of a) tonsillitis, b) otitis media, c) lower respiratory tract infections (LRTI), d) gastro-intestinal (GI) infections, e) appendicitis, f) testicular torsion, g) intussusception, volvulus and malrotation (combined group), h) mental health issues, i) diabetic keto-acidosis, j) radius fracture, k) minor head injury; comparing the 28-day mean numbers for the months of January – April for 2018 vs. 2019 vs. 2020.



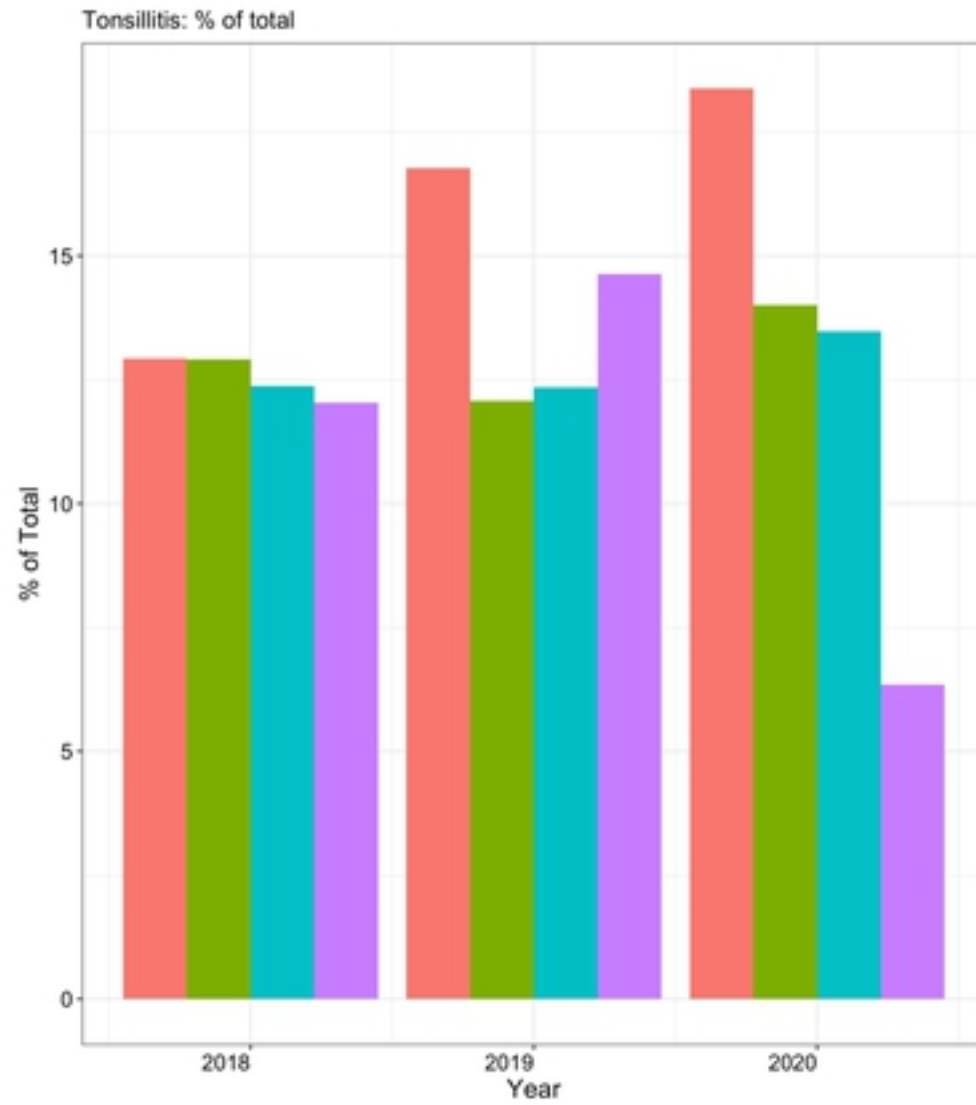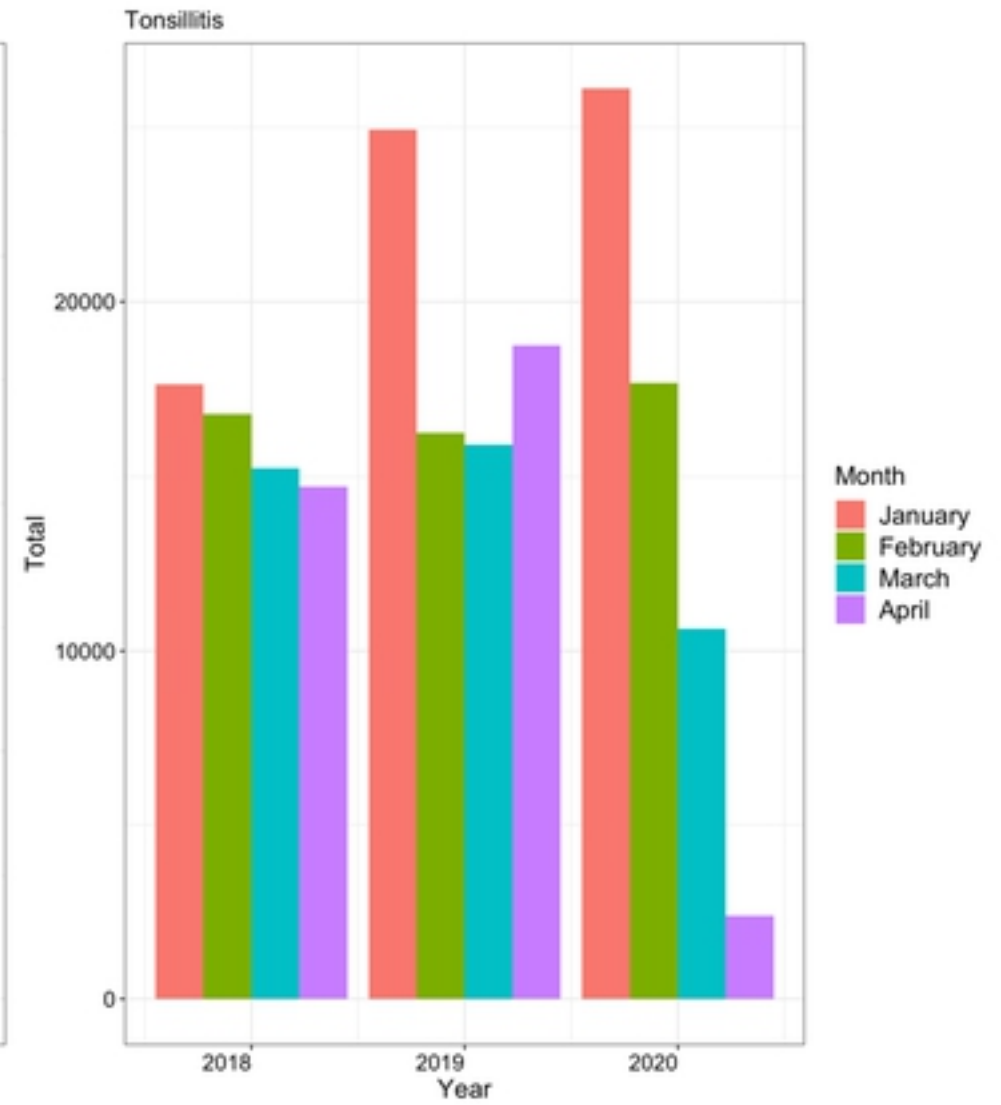

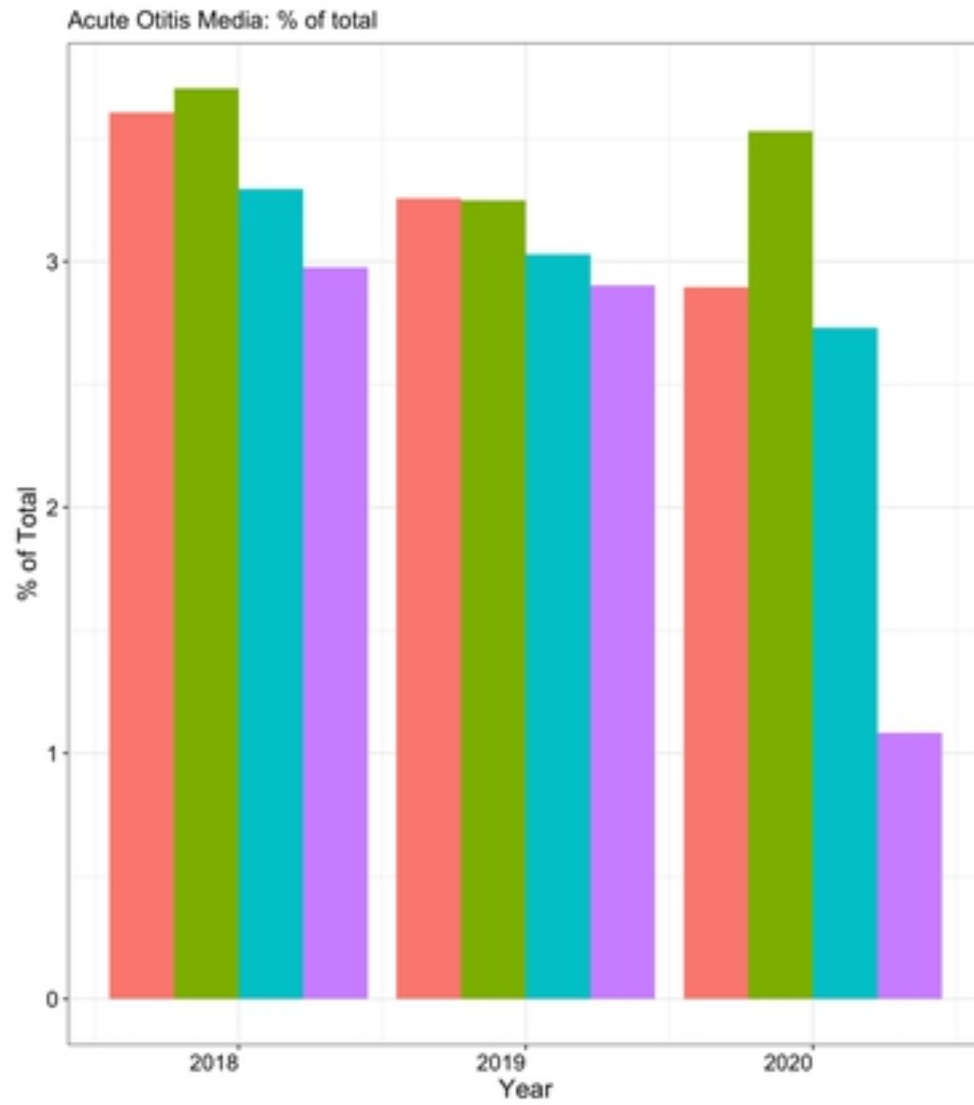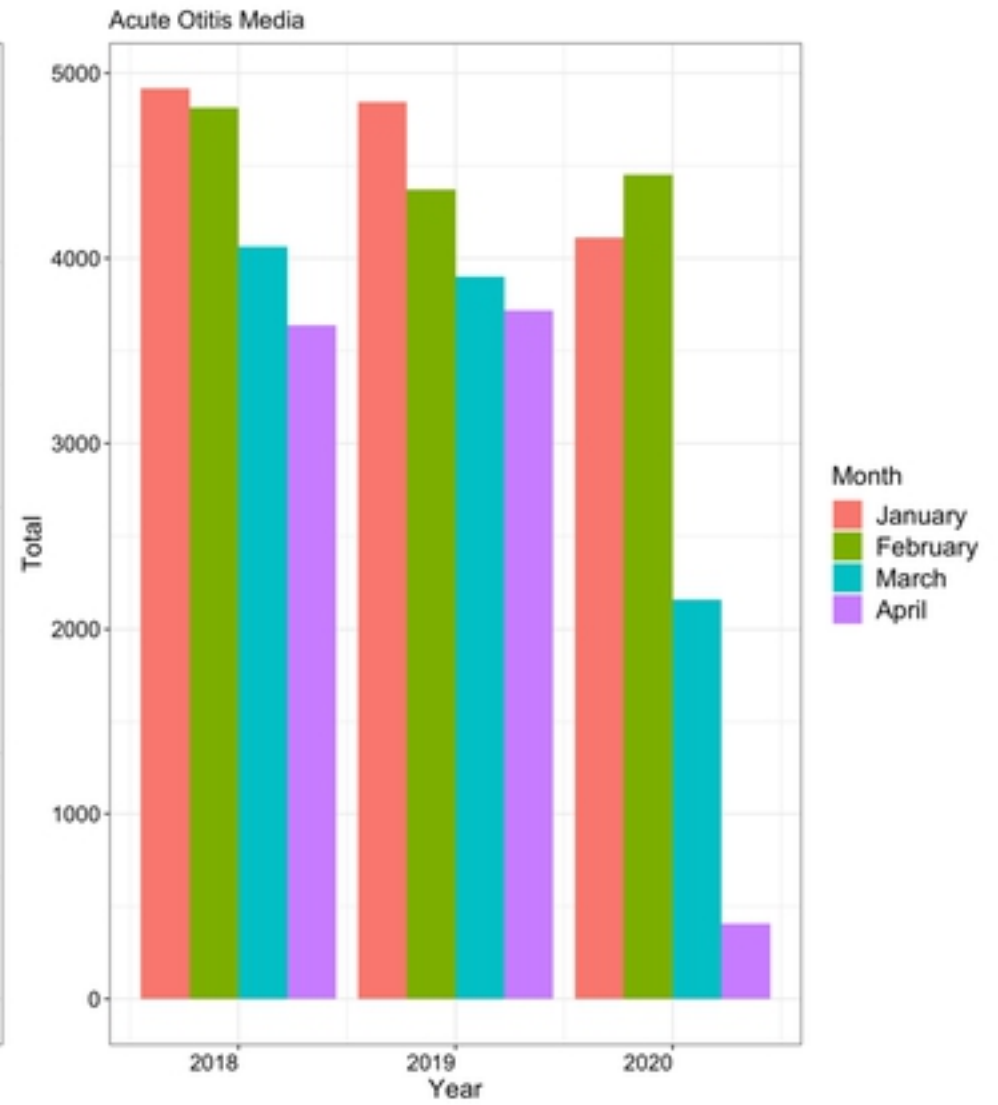

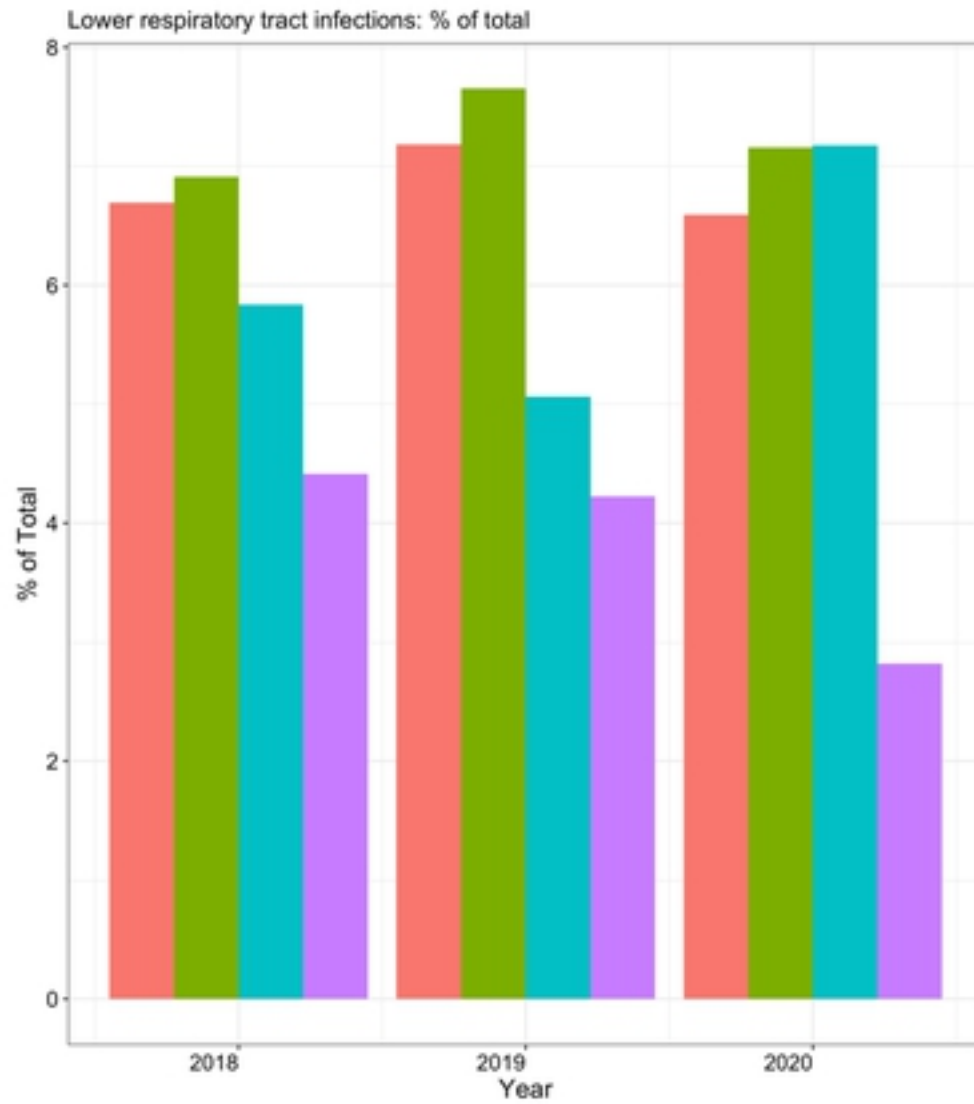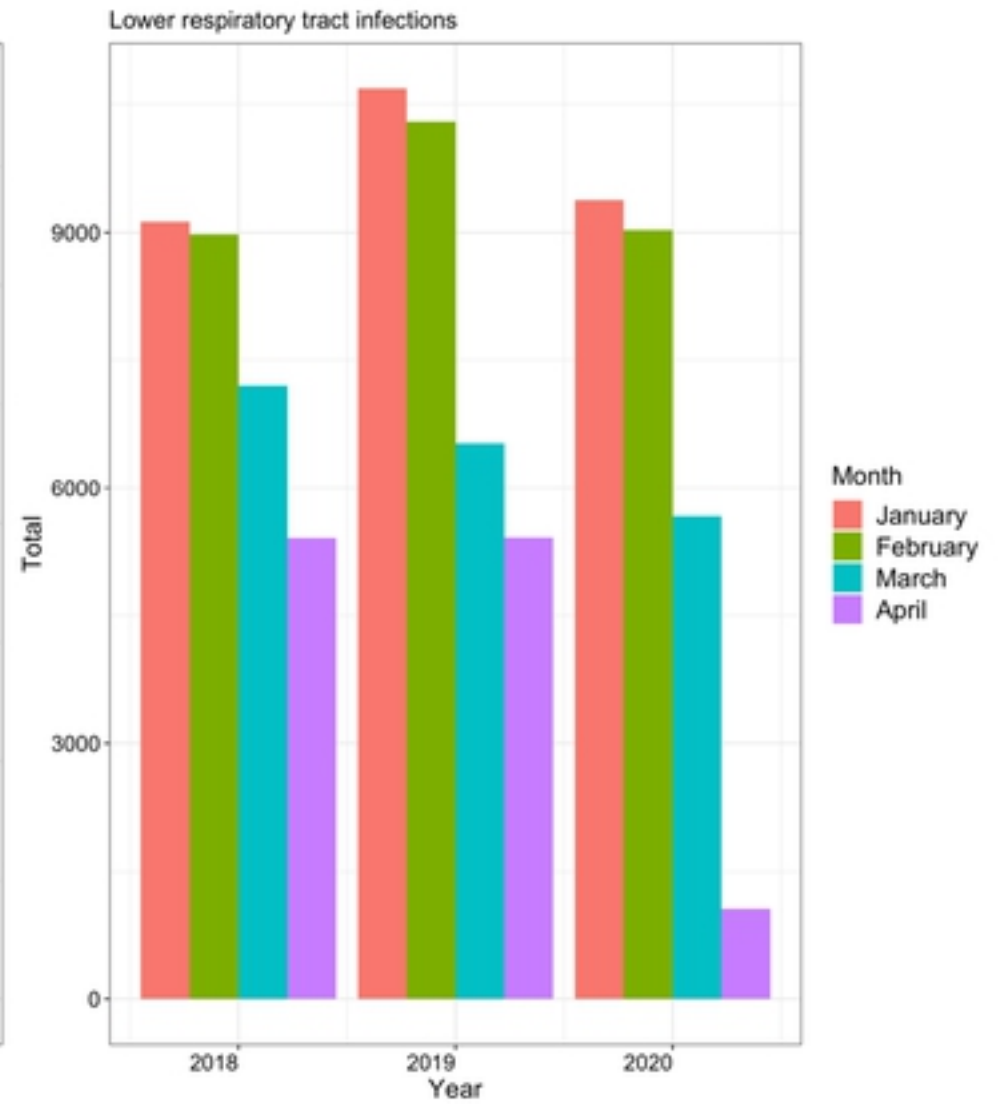

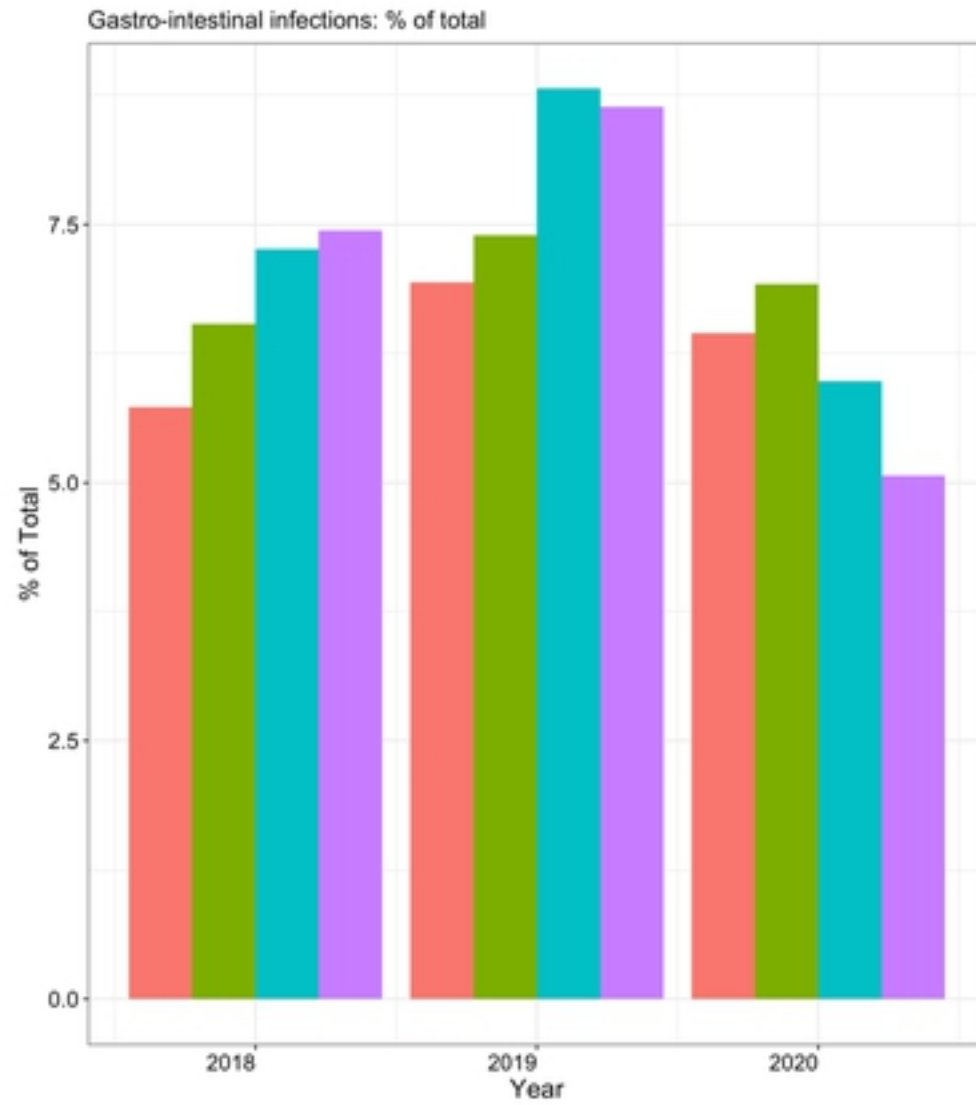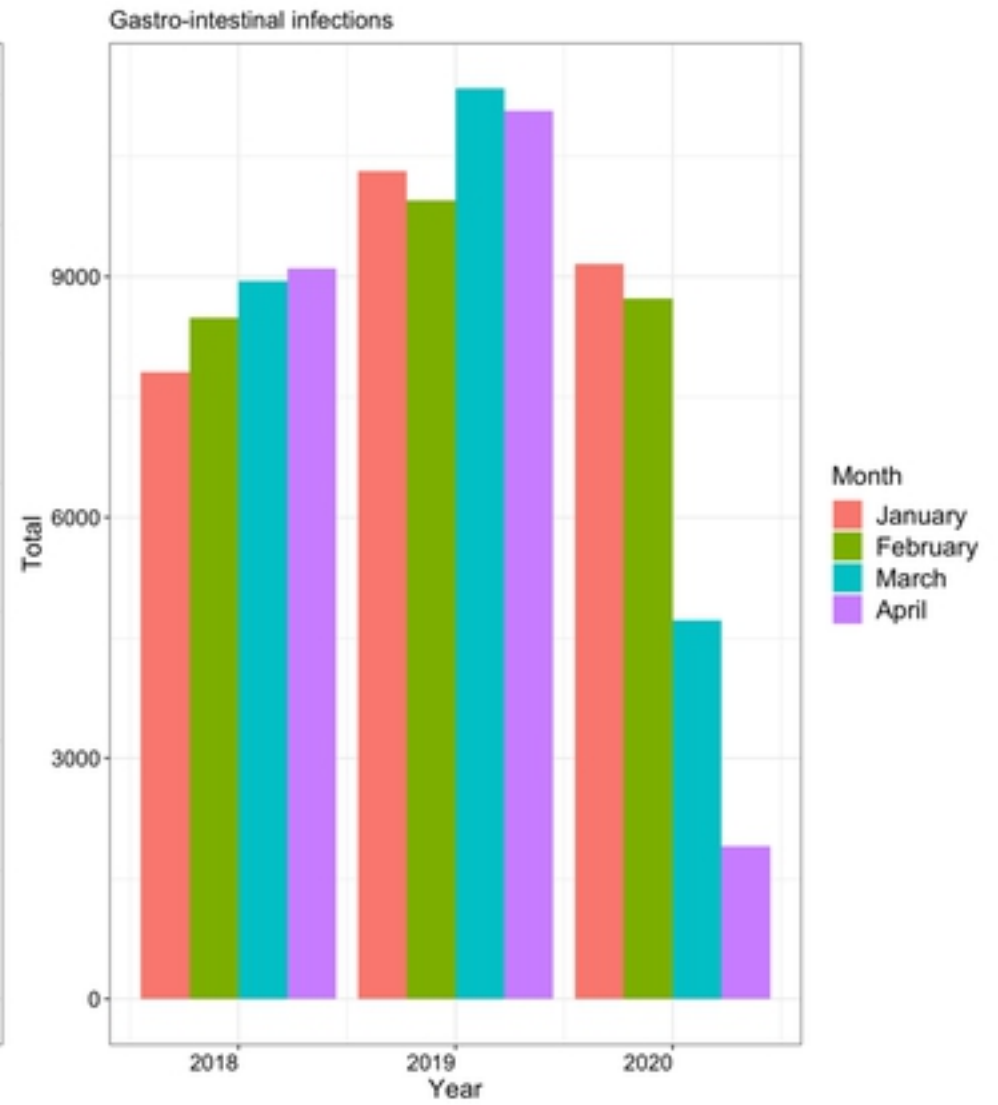

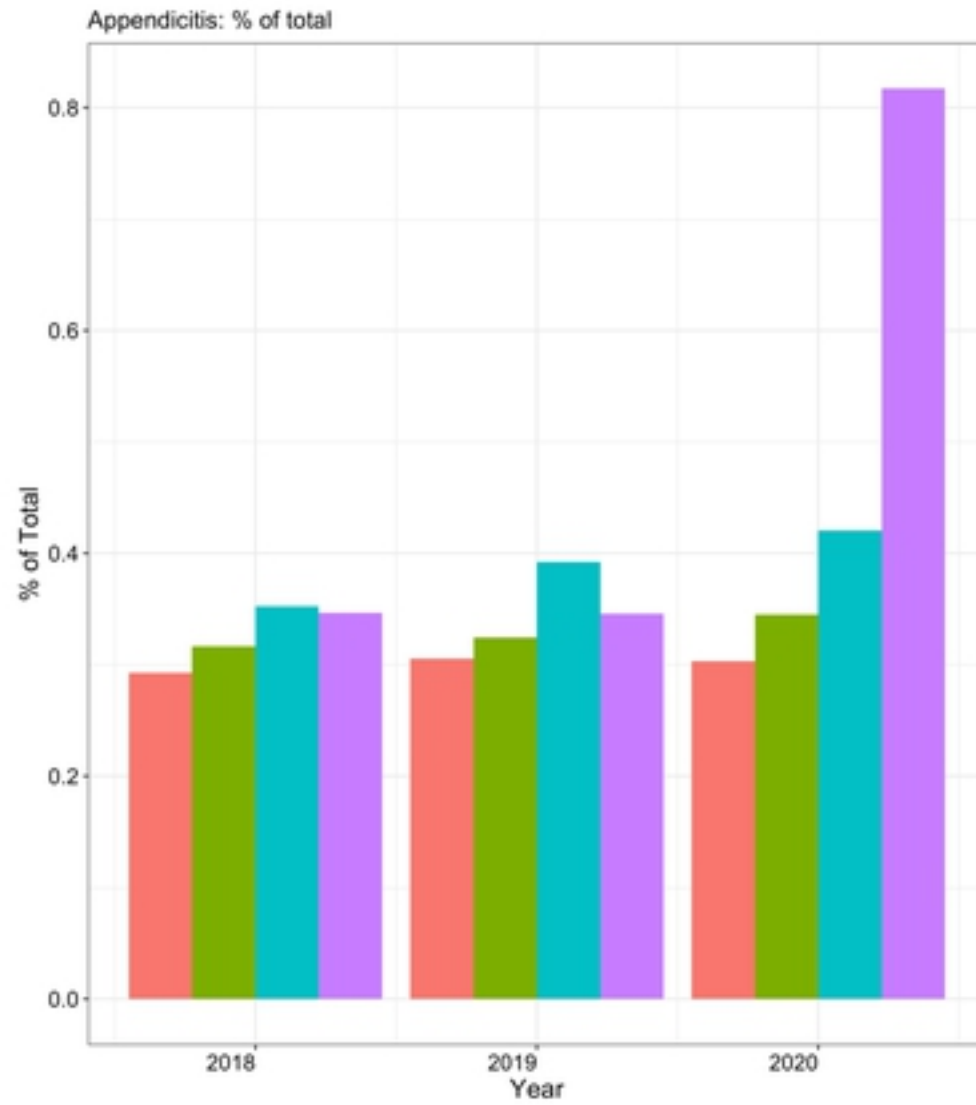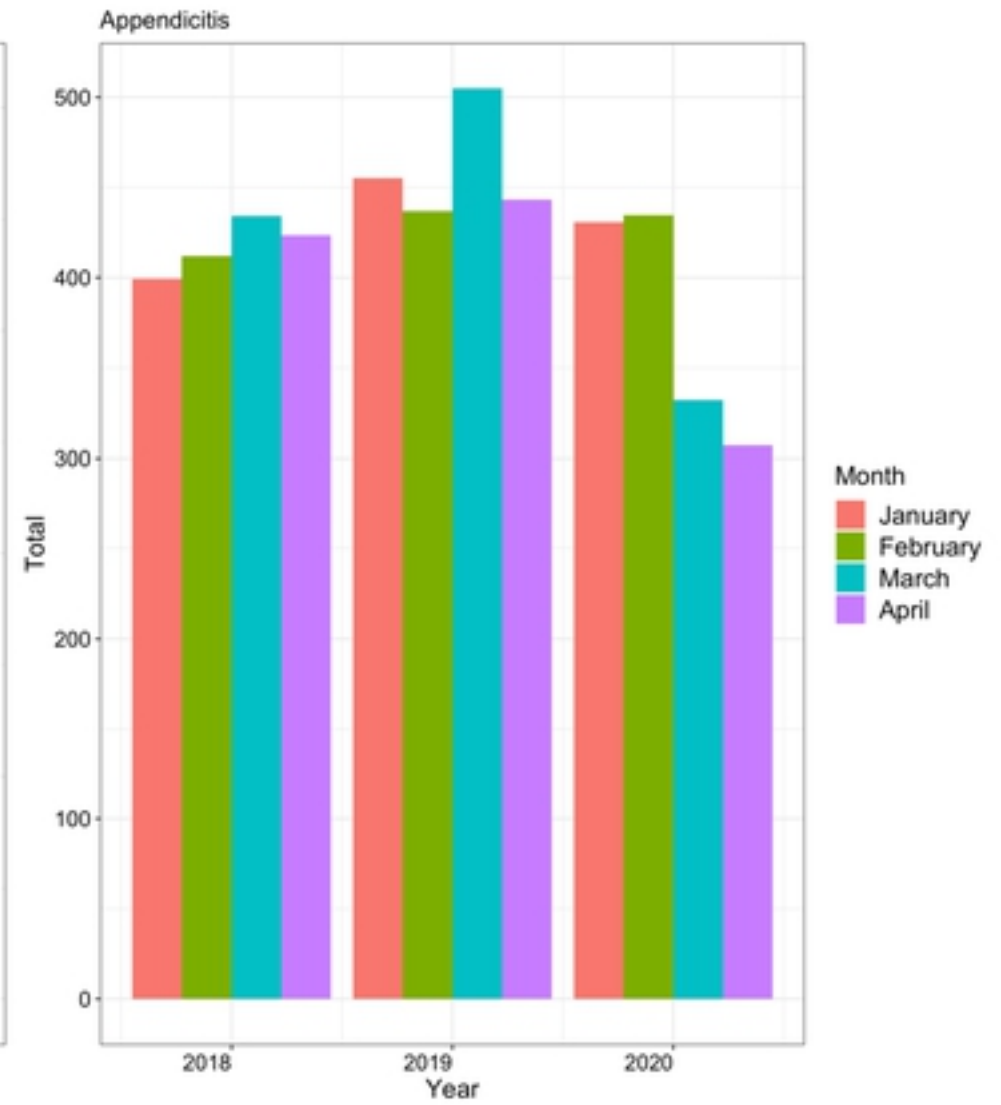

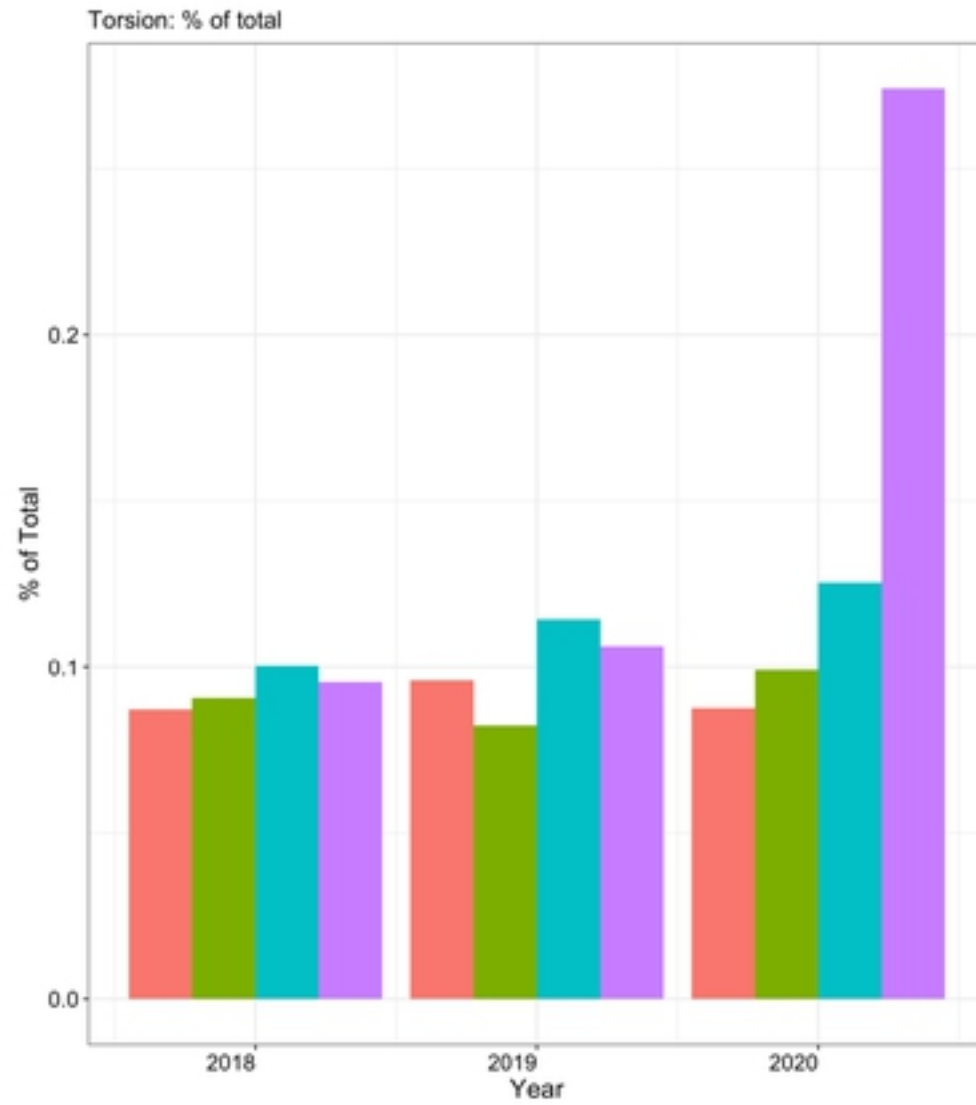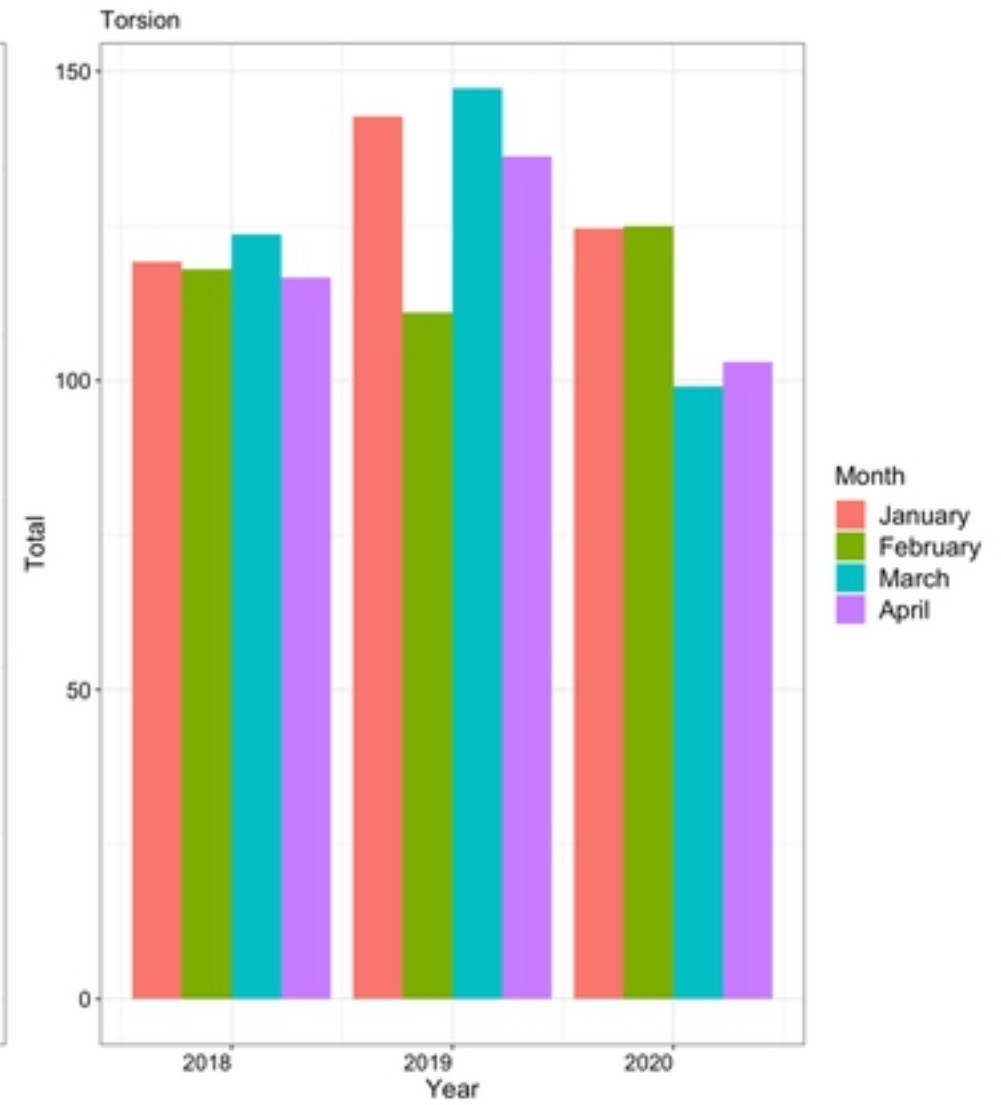

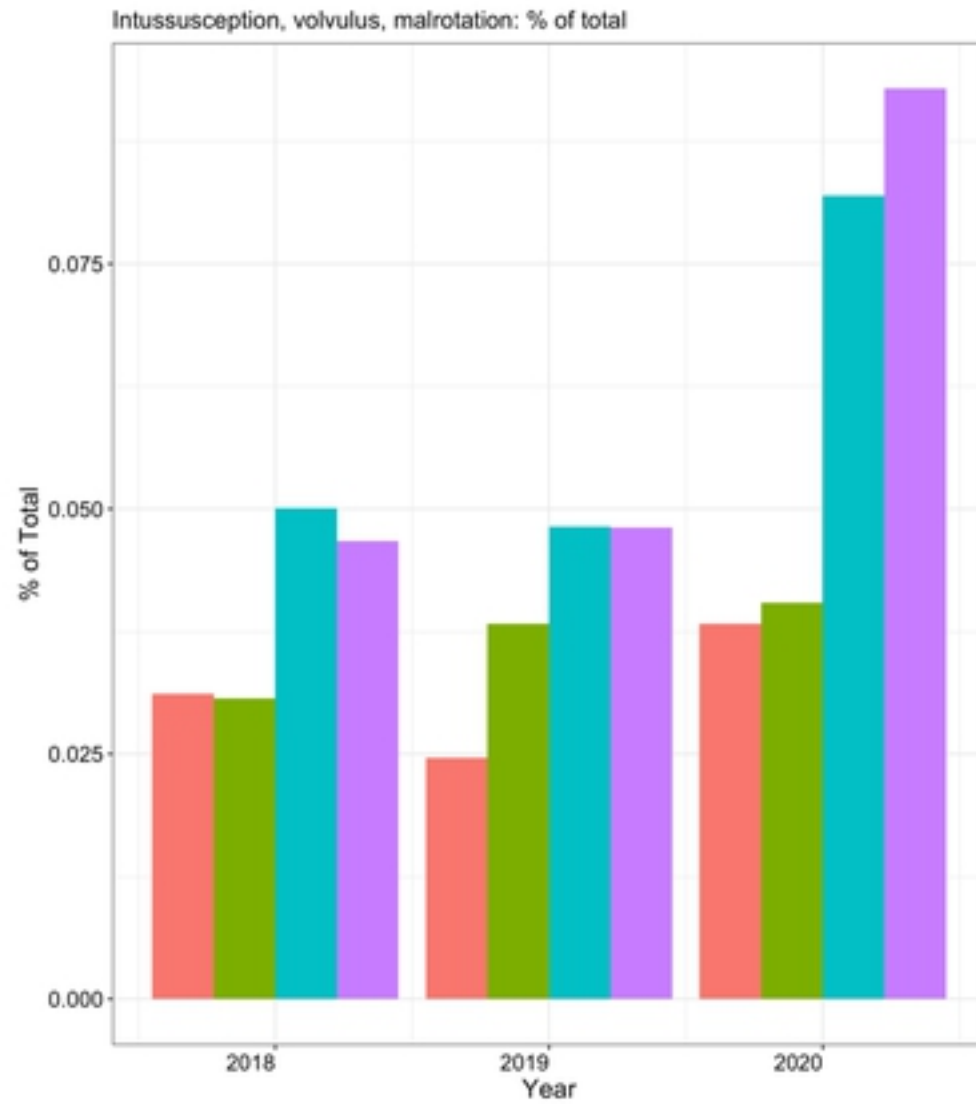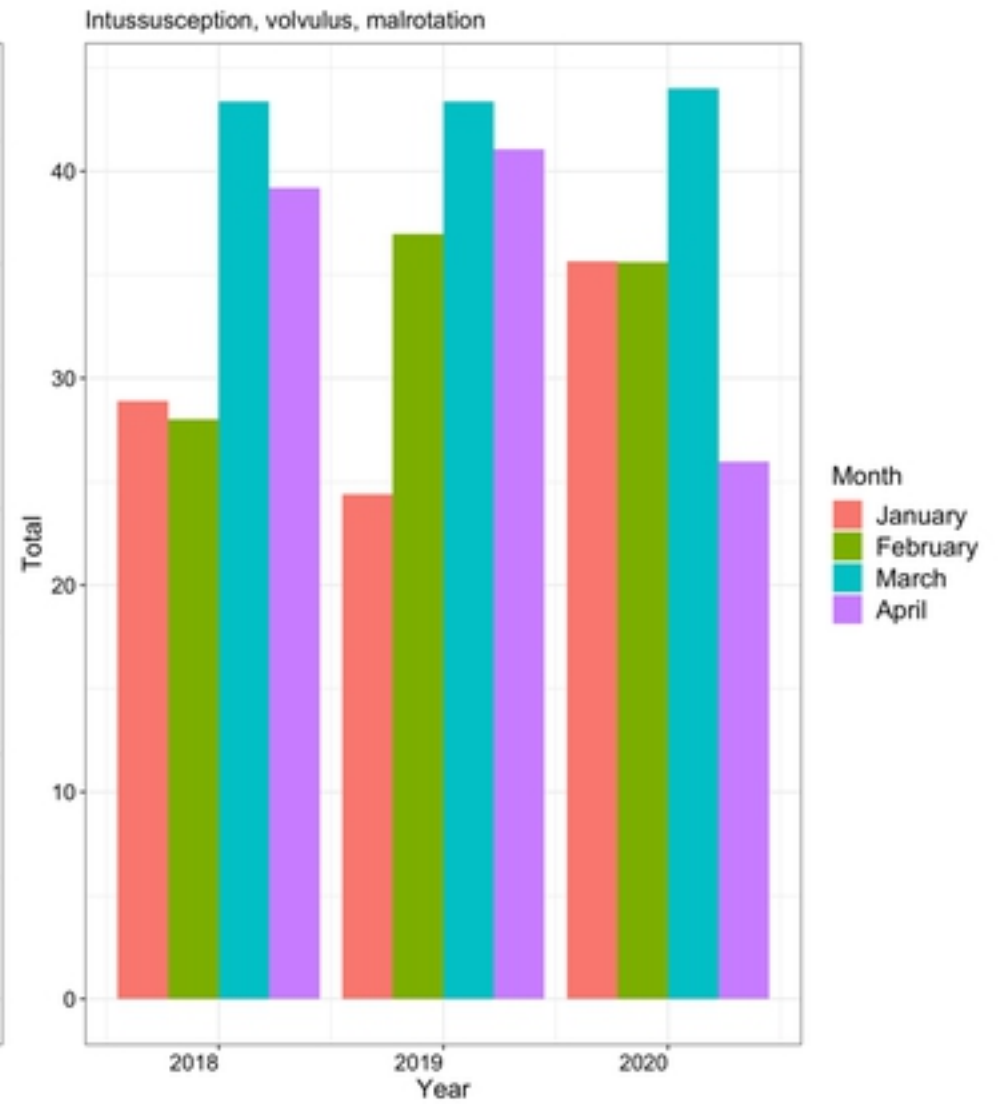

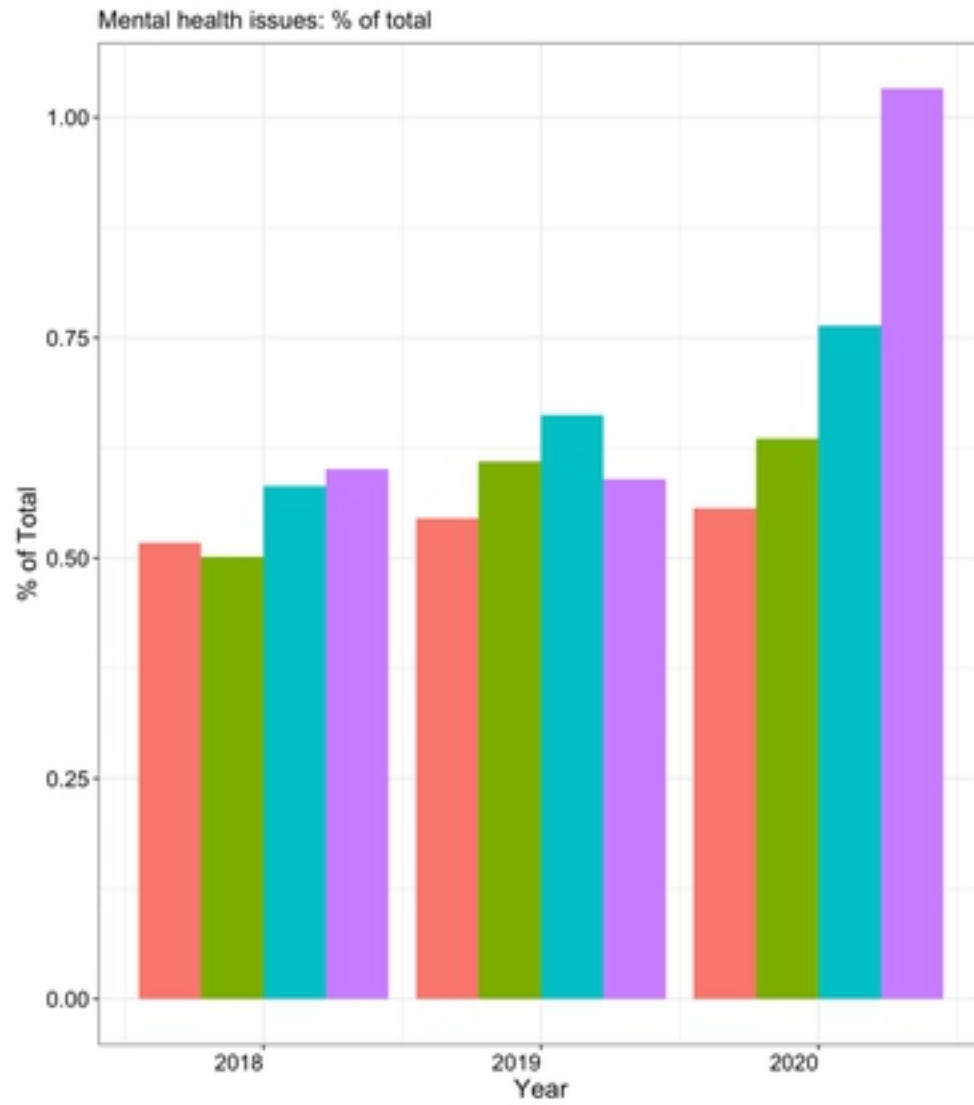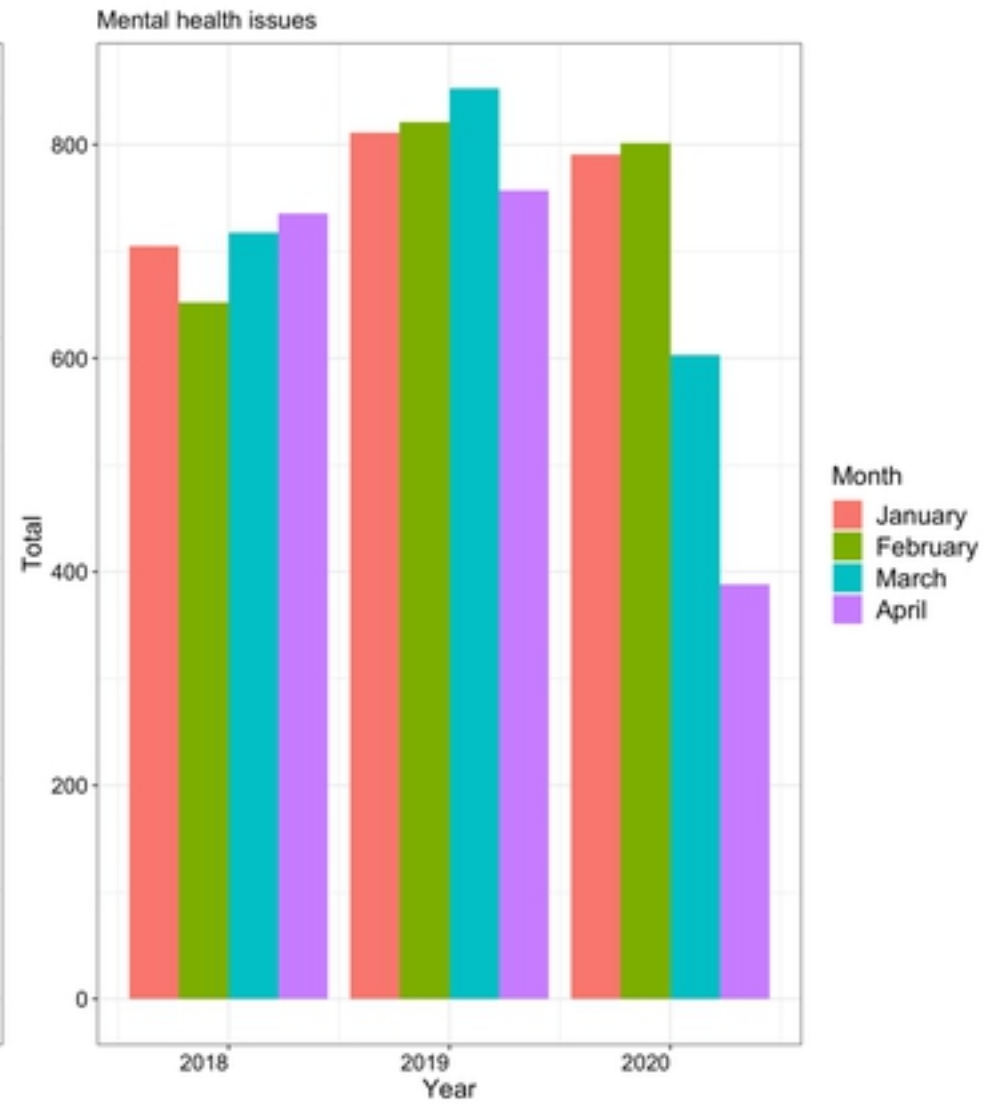



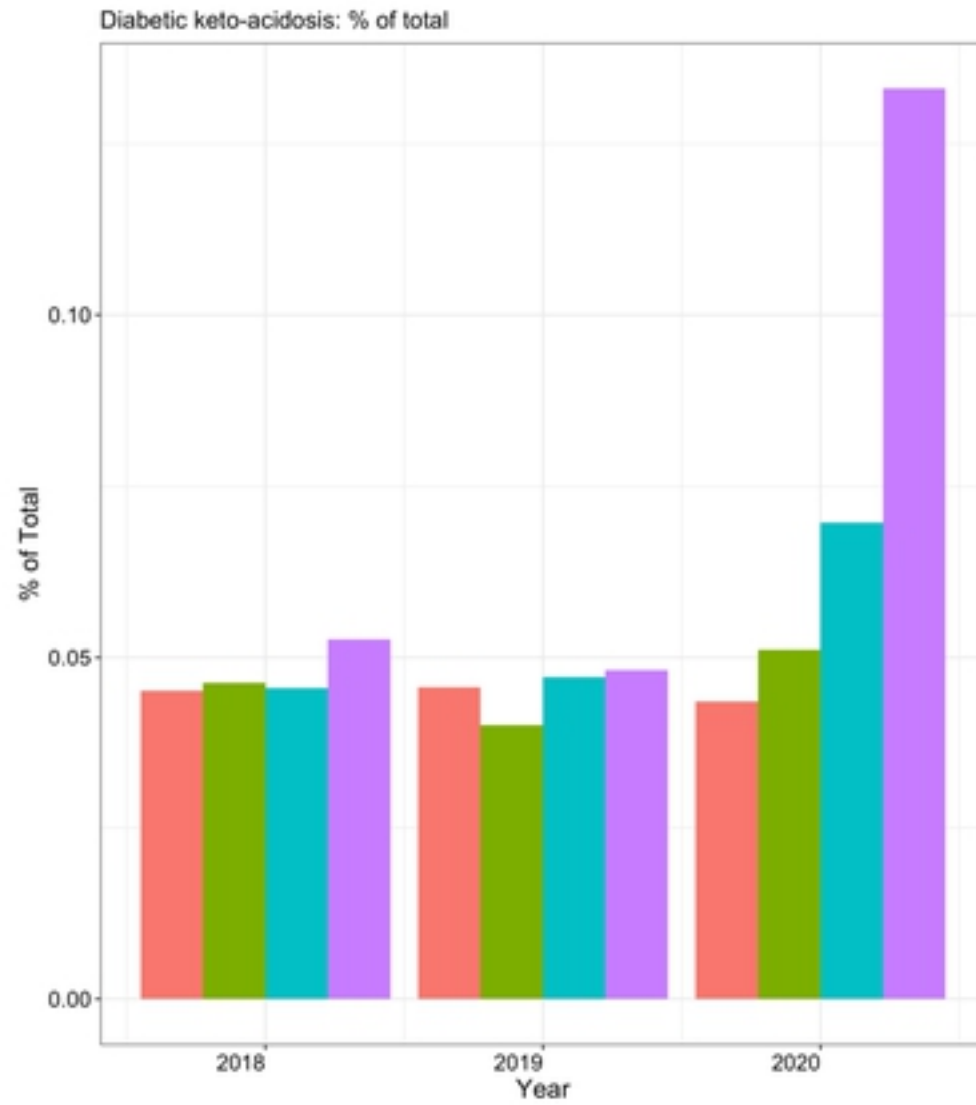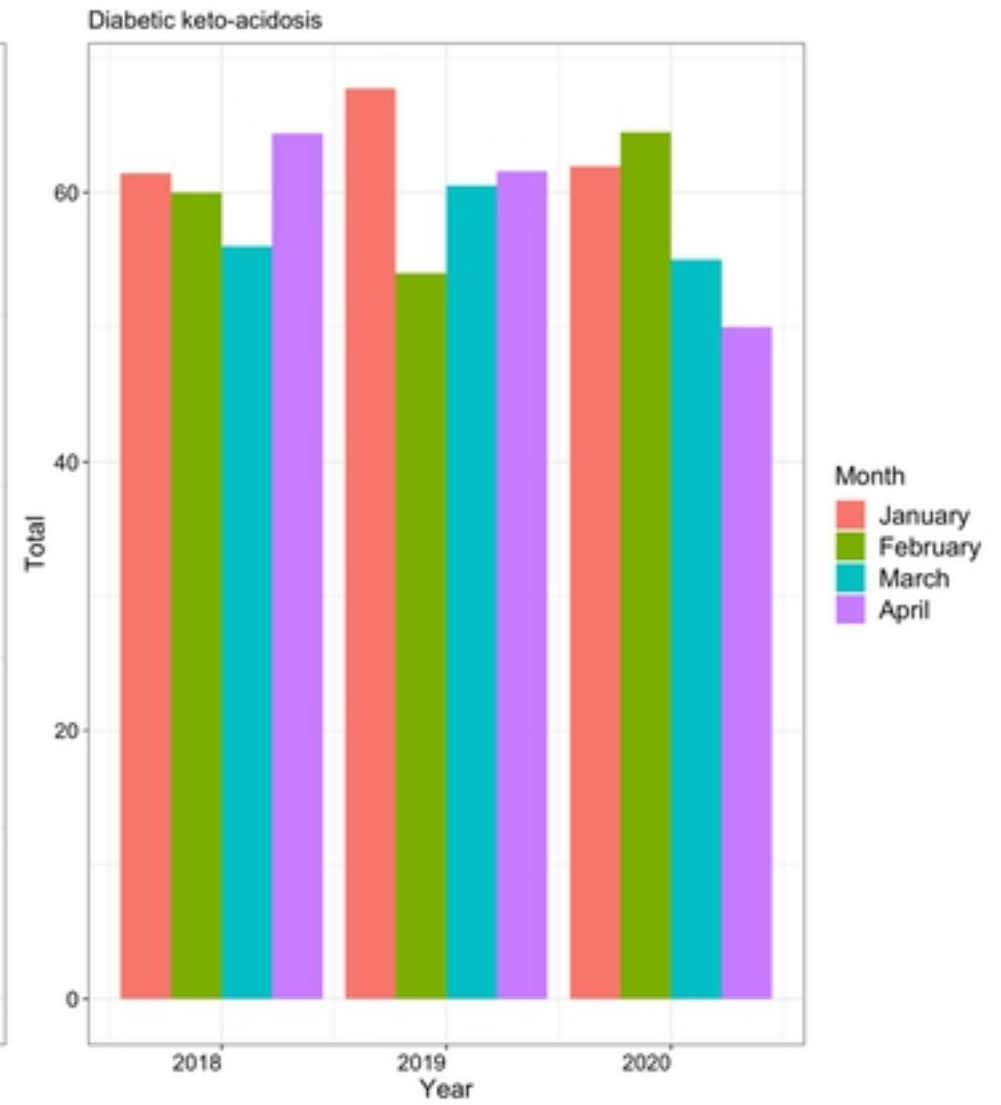

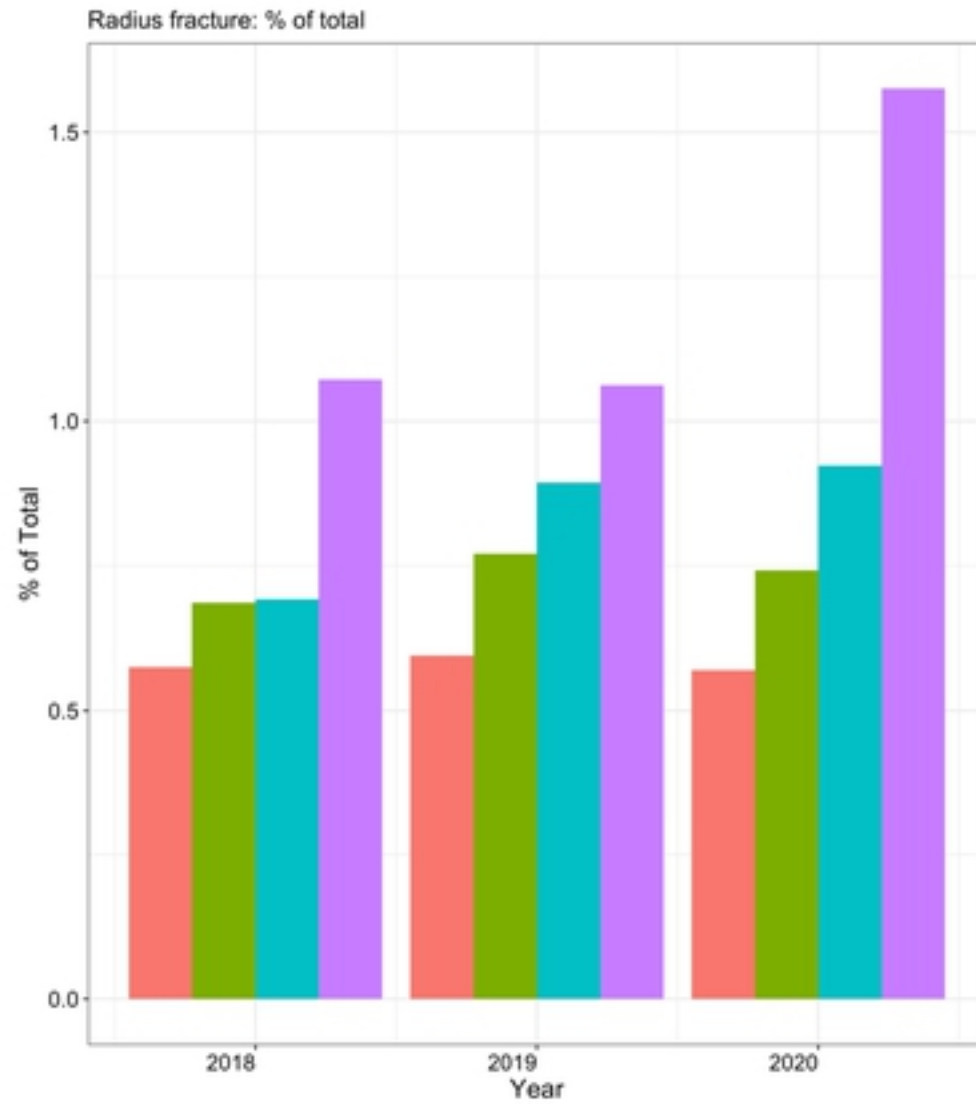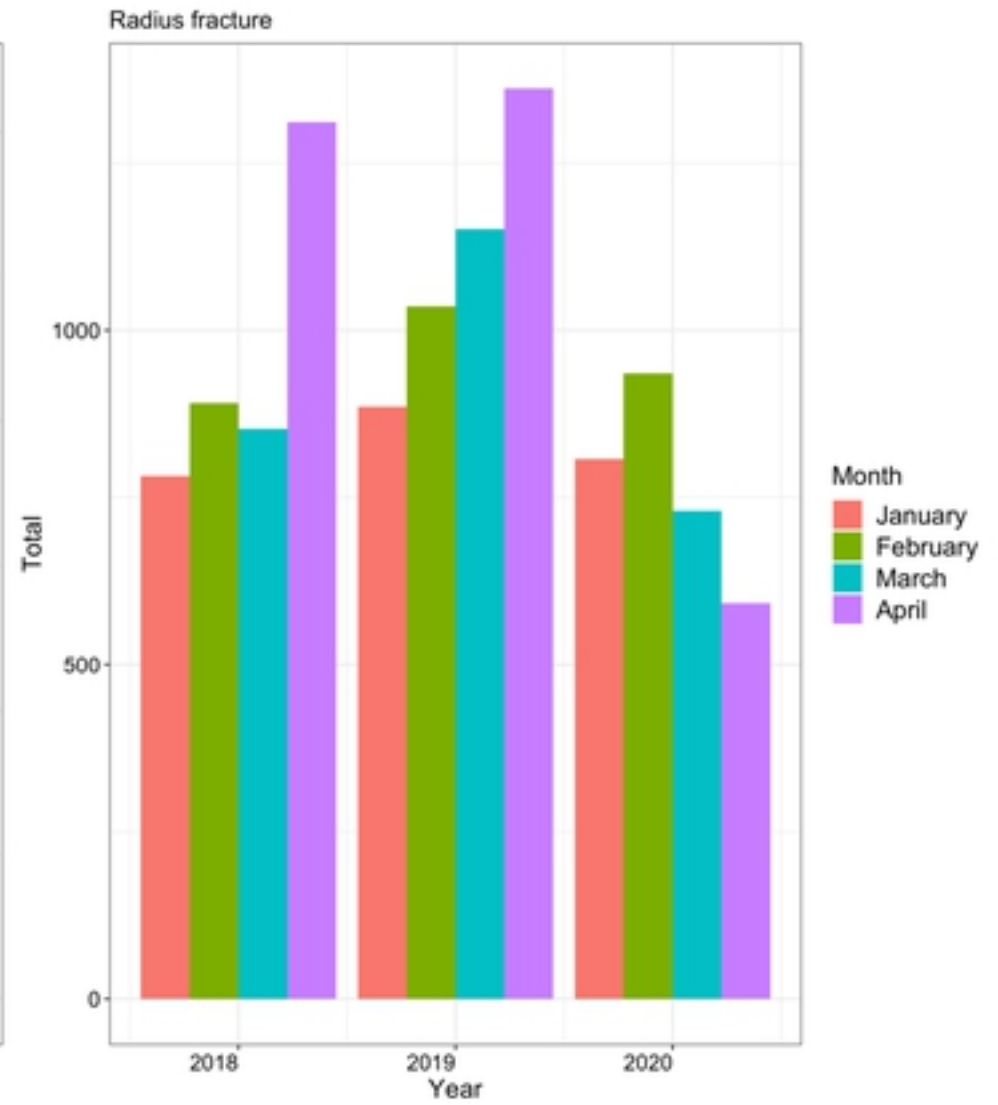

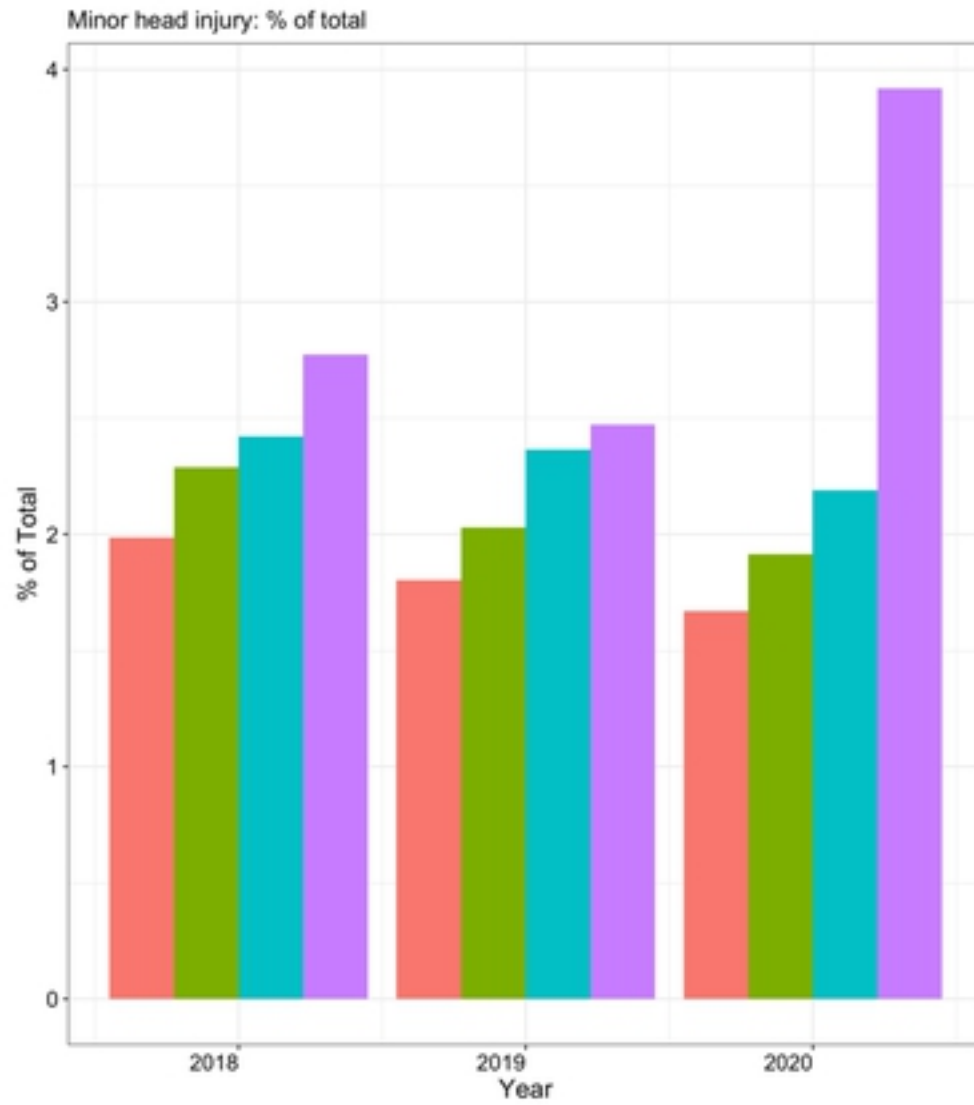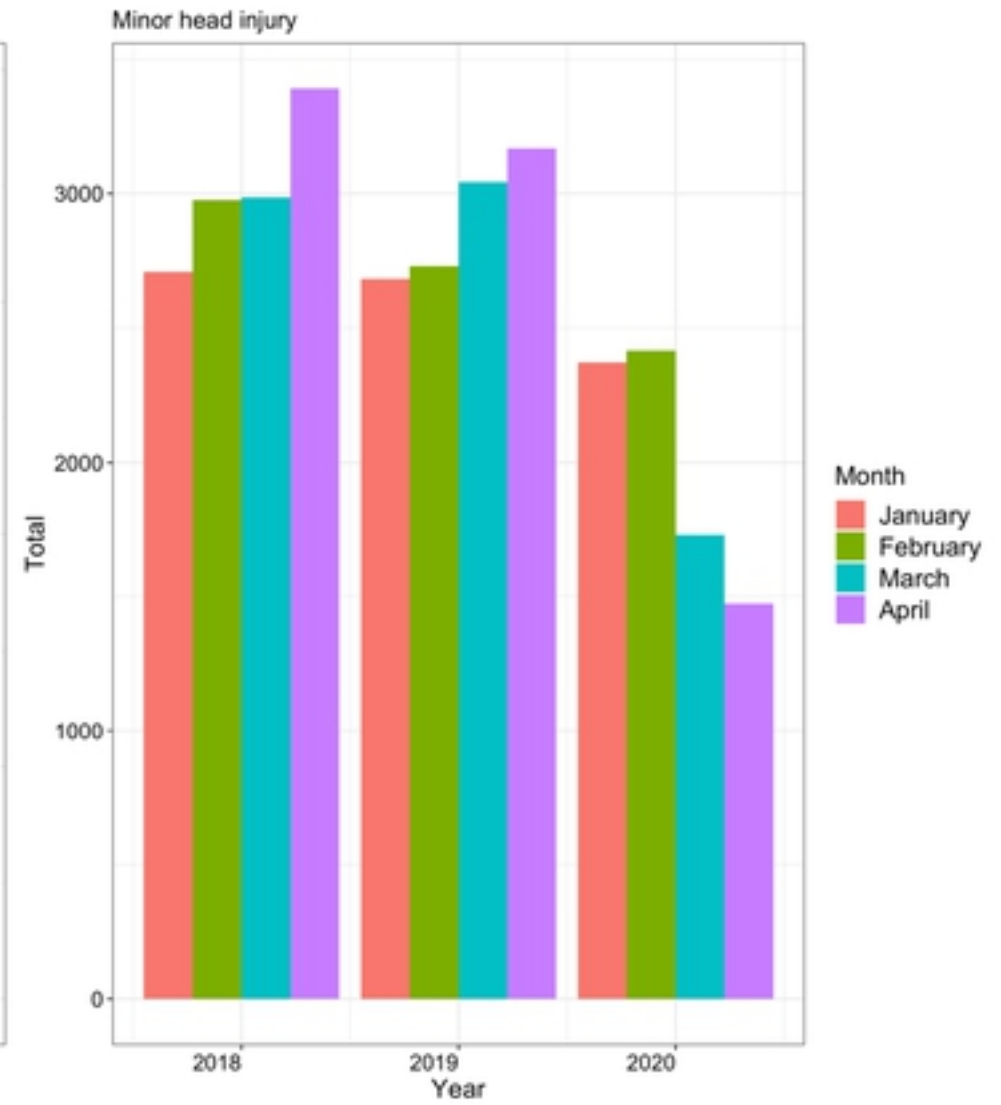

Figure 6. Observed and predicted in % for the number of selected diagnoses.

Legend:

The observed and predicted numbers of eight selected diagnoses for all sites combined, for the period following February 2<sup>nd</sup> 2020 until May 4<sup>th</sup> 2020.

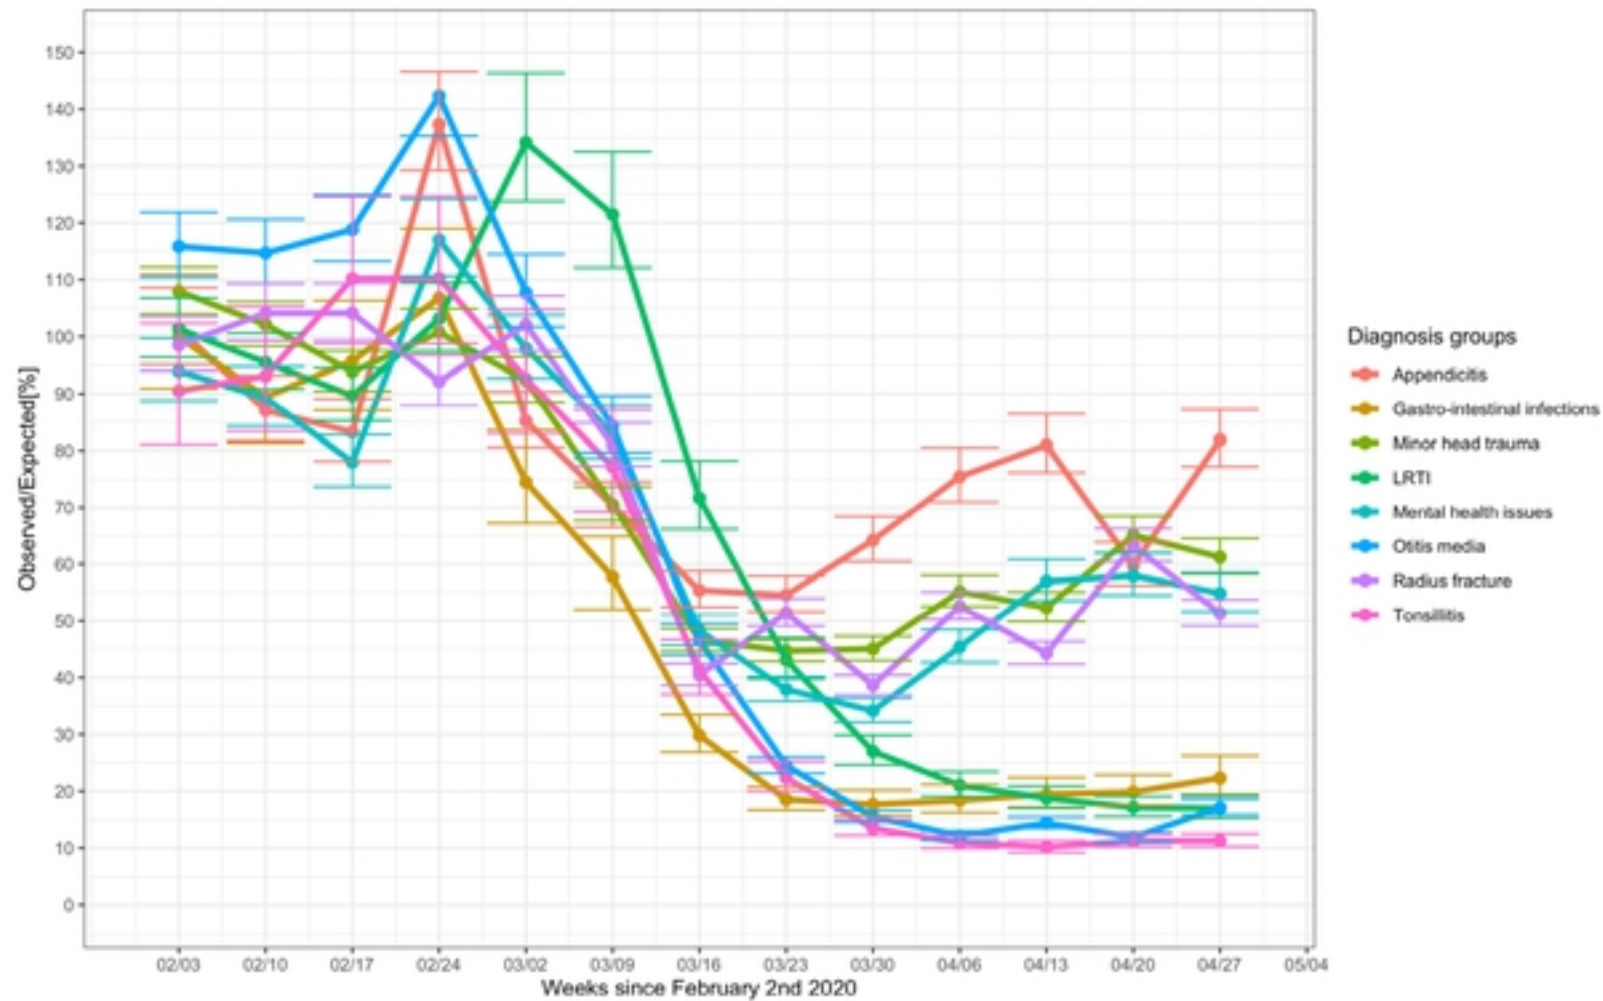

Source: https://www.medrxiv.org/content/medrxiv/early/2022/03/27/2022.03.25.22272926.full.pdf
